# Supplementary material for: The conservation landscape of the human ribosomal RNA gene repeats
Source: PubMed Central journal article supplement (PMC6281188; doi:10.1371/journal.pone.0207531), 2018-12-05
Supplement: pone.0207531.s005.pdf [file pone.0207531.s005.pdf]

KY962518\_1 gctgacacgctgtcctctggcgacctgtcgttgagaggggtgggacctccggatgcccgcggggctctggcctaccggtagaccggctagccggccggcctcctgcttgagccgcttccggggcccgcg 130  
 human\_rDNA gctgacacgctgtcctctggcgacctgtcgttgagaggggtgggacctccggatgcccgcggggctctggcctaccggtagaccggctagccggccggcctcctgcttgagccgcttccggggcccgcg 130

KY962518\_1 gccctgctgttctctcgcgcgtccgagcgtcccgacctccgggtgccggccccgggtccgggtctcttgaccacccggggggcggcggggaaggcggcgagggccaccgtgcccccgtgcctctccgctgcgg 260  
 human\_rDNA gccctgctgttctctcgcgcgtccgagcgtcccgacctccgggtgccggccccgggtccgggtctcttgaccacccggggggcggcggggaaggcggcgagggccaccgtgcccccgtgcctctccgctgcgg 260

KY962518\_1 ggcgccggggcgggccgcgacaacccccaccccgctggctccgtgcccgtgctgctcaggcgttctcgtctccgggggttgtccggccgccccttcccggagtggggggttggccggagccgatcggctcgc 390  
 human\_rDNA ggcgccggggcgggccgcgacaacccccaccccgctggctccgtgcccgtgctgctcaggcgttctcgtctccgggggttgtccggccgccccttcccggagtggggggttggccggagccgatcggctcgc 390

KY962518\_1 tggccggccggccggcctccgctcccggggggctctcgtgatcgaatgtggtgacgtcgtgctctcccggccgggtccgagccgcgacgggcgaggggaggcgttcgtggcgaaacgggaccgtccttc 520  
 human\_rDNA tggccggccggccggcctccgctcccggggggctctcgtgatcgaatgtggtgacgtcgtgctctcccggccgggtccgagccgcgacgggcgaggggaggcgttcgtggcgaaacgggaccgtccttc 520

KY962518\_1 tcgctccgccccgggggggtcccctcgtctctcctctcccggccccggcggtgctgttgggaaaggcgtgggggtcgggacccggcccgacctcggcgtcccggccggcccttctcgttcgctcgggtgc 650  
 human\_rDNA tcgctccgccccgggggggtcccctcgtctctcctctcccggccccggcggtgctgttgggaaaggcgtgggggtcgggacccggcccgacctcggcgtcccggccggcccttctcgttcgctcgggtgc 649

KY962518\_1 gggccggcggggtcctctgacgcggcagacagccctcgtctcgcctccagtggttctcgaacttgcggcgccccccctcccggcggttgggggtgccgtcccggccggccgtcgtgctgcccctctcgg 780  
 human\_rDNA gggccggcggggtcctctgacgcggcagacagccctcgtctcgcctccagtggttctcgaacttgcggcgccccccctcccggcggttgggggtgccgtcccggccggccgtcgtgctgcccctctcgg 779

KY962518\_1 gggttgcgcgagcgtggctccgctggcccttgcgggtgctcctggagcgtcccgggttgtccctcagggtgcccgaggccgaacgggtggtgtgcttcccggcccgcgccccctcctcgggtcgc 910  
 human\_rDNA gggttgcgcgagcgtggctccgctggcccttgcgggtgctcctggagcgtcccgggttgtccctcagggtgcccgaggccgaacgggtggtgtgcttcccggcccgcgccccctcctcgggtcgc 909

KY962518\_1 cgcccggtgtcgcgcggtgggtcctgagggagctcgtcgggttgggggtcggggcggtttagtgagacgagacgagacgagacgagcccccctccacgcgggggaaggcgcccgcctgctctcggtgagcgac 1040  
 human\_rDNA cgcccggtgtcgcgcggtgggtcctgagggagctcgtcgggttgggggtcggggcggtttagtgagacgagacgagacgagacgagcccccctccacgcgggggaaggcgcccgcctgctctcggtgagcgac 1039

KY962518\_1 gtcccgtgctccccttggcggggtgcgcgcggggcggttgagcgaatcgcggtgggttccggccgggttgacgcgtgcgcggcgggccggcggaggggctgccgttctgctccgaccggctcgtgtgtgg 1170  
 human\_rDNA gtcccgtgctccccttggcggggtgcgcgcggggcggttgagcgaatcgcggtgggttccggccgggttgacgcgtgcgcggcgggccggcggaggggctgccgttctgctccgaccggctcgtgtgtgg 1169

KY962518\_1 ttgacttcggaggcgtctgacctggaaaggagggtgggtggacggggggcctgggtgggggttgcgcgacgcgcgacccggccggggccccggcctgaacgcgaacgctcagaggtggccgcgcgac 1300  
 human\_rDNA ttgacttcggaggcgtctgacctggaaaggagggtgggtggacggggggcctgggtgggggttgcgcgacgcgcgacccggccggggccccggcctgaacgcgaacgctcagaggtggccgcgcgac 1299

KY962518\_1 gtgtttcctcgtaccgcagggccccctcccctcccagggcgtcccctcggcgccctctcggggccggaggagcggctggcgggtggggggagtgtagccaccctcggtgagaaaagccttctctagcg 1430  
 human\_rDNA gtgtttcctcgtaccgcagggccccctcccctcccagggcgtcccctcggcgccctctcggggccggaggagcggctggcgggtggggggagtgtagccaccctcggtgagaaaagccttctctagcg 1429

KY962518\_1 atctgagaggcgtgacctgggggtaccggaatccccggggccggccctctgtctctgctccgttatggttagcgtgcccgtagcgaccgctcgcagaggaccctcctccgcttccccctcagcgggtt 1560  
 human\_rDNA atctgagaggcgtgacctgggggtaccggaatccccggggccggccctctgtctctgctccgttatggttagcgtgcccgtagcgaccgctcgcagaggaccctcctccgcttccccctcagcgggtt 1559

KY962518\_1 gggggggagaaagcaggggttccgcccggccaccgggtgggtggccgagtgccgctcgtcgcctactgtggcccgccctccccttccgagtcggggggagatcccgcggggccgggcccggcg-tcccag 1689  
 human\_rDNA gggggggagaaagcaggggttccgcccggccaccgggtgggtggccgagtgccgctcgtcgcctactgtggcccgccctccccttccgagtcggggggagatcccgcggggccgggcccggcg-tcccag 1689

KY962518\_1 cgggttgggacgcccggccggcgggcggtgggtgtgcccgcggcgctctgtcccggcggtgactcccctcccggcgagtcggctctcccggcctcccgttccgagtcgtgaccgggtgccgacgac 1819  
 human\_rDNA cgggttgggacgcccggccggcgggcggtgggtgtgcccgcggcgctctgtcccggcggtgactcccctcccggcgagtcggctctcccggcctcccgttccgagtcgtgaccgggtgccgacgac 1819

KY962518\_1 gcggttgcgtggcaggggtcgggcccgcctggcccgggaaagcgtcccacgggtggggggcgcgcgggtctcccggagcgggaccgggtcggaggatggacgagaaacacgagcagcgggtgggtggcgg 1949  
 human\_rDNA gcggttgcgtggcaggggtcgggcccgcctggcccgggaaagcgtcccacgggtggggggcgcgcgggtctcccggagcgggaccgggtcggaggatggacgagaaacacgagcagcgggtgggtggcgg 1949

KY962518\_1 tgtcgggttctgtggctcgggtcgtcccggggccccgggtggcggggccccggggcctcgcgagggcgttctcgggtggggggcgaggccgtcccggcgtcccagggcggggcgccgggaccgcccctcgtgt 2079  
 human\_rDNA tgtcgggttctgtggctcgggtcgtcccggggccccgggtggcggggccccggggcctcgcgagggcgttctcgggtggggggcgaggccgtcccggcgtcccagggcggggcgccgggaccgcccctcgtgt 2079

```

KY962518_1 ctgtggcggaggatcccgcggccgtgttttccctgggtggccccggccgtgcctgagggtttctcccggagccggccctctgcccggctcccgggtgcccttgcctcgcgggtcccggccctcgcctctg 2209
human_rDNA ctgtggcggaggatcccgcggccgtgttttccctgggtggccccggccgtgcctgagggtttctcccggagccggccctctgcccggctcccgggtgcccttgcctcgcgggtcccggccctcgcctctg 2209
          2,220          2,240          2,260          2,280          2,300          2,320          2,340
KY962518_1 tgcctcttcccgcggccggccccggcagatcctcttcttccccccgagcggctcaccggcttaccgtccgttggaggccccggcctgggaccgaaaccggcaccgctctgtggggcggccggccggccac 2339
human_rDNA tgcctcttcccgcggccggccccggcagatcctcttcttccccccgagcggctcaccggcttaccgtccgttggaggccccggcctgggaccgaaaccggcaccgctctgtggggcggccggccggccac 2339
          2,360          2,380          2,400          2,420          2,440          2,460
KY962518_1 tgatcggcccggcgtccgcgtccccggcggcgcccttggggaccgggtcggaggcgcgccggctggggccccggagggttcccggagggttccgggggtcggcctcggcggcgttgcggggaggagacg 2469
human_rDNA tgatcggcccggcgtccgcgtccccggcggcgcccttggggaccgggtcggaggcgcgccggctggggccccggagggttcccggagggttccgggggtcggcctcggcggcgttgcggggaggagacg 2469
          2,480          2,500          2,520          2,540          2,560          2,580          2,600
KY962518_1 gttccgggggaccggccgcgactgcggcggcgggtggagggggagccgggggattccggaggccgggtcggccgccccgggtgcccgcgggtgccgcggcggcggtgaggccccgcgtgtgtcccg 2599
human_rDNA gttccgggggaccggccgcgactgcggcggcgggtggagggggagccgggggattccggaggccgggtcggccgccccgggtgcccgcgggtgccgcggcggcggtgaggccccgcgtgtgtcccg 2599
          2,620          2,640          2,660          2,680          2,700          2,720
KY962518_1 gctcgggtcggcggcgtcaggggtcccctgagggttccccccggcggccttctcggccttcccgtcggcccggcctcggccgtgggtctctcgtcttcccggcccgctcttccgaaacc 2729
human_rDNA gctcgggtcggcggcgtcaggggtcccctgagggttccccccggcggccttctcggccttcccgtcggcccggcctcggccgtgggtctctcgtcttcccggcccgctcttccgaaacc 2729
          2,740          2,760          2,780          2,800          2,820          2,840          2,860
KY962518_1 gggtcggcggcgtccccgggtcgcctcgttcccgggcttcccgggccttcccggaggcgtccgtcccggggcgtcggcgtcggggagagaccgcttcccgcgtggcgtcggccccgttggcggcgc 2859
human_rDNA gggtcggcggcgtccccgggtcgcctcgttcccgggcttcccgggccttcccggaggcgtccgtcccggggcgtcggcgtcggggagagaccgcttcccgcgtggcgtcggccccgttggcggcgc 2859
          2,880          2,900          2,920          2,940          2,960          2,980
KY962518_1 gcgtcggcccggcggcggccccgggtgggtcccctccggagaccggcgttctgtcggactgtggcgtgggtcgacctccgccttgcgggtcgcctcggcccttcccggggtcggggggtggggccccggccggggc 2989
human_rDNA gcgtcggcccggcggcggccccgggtgggtcccctccggagaccggcgttctgtcggactgtggcgtgggtcgacctccgccttgcgggtcgcctcggcccttcccggggtcggggggtggggccccggccggggc 2989
          3,000          3,020          3,040          3,060          3,080          3,100          3,120
KY962518_1 ctgcggcccggcgcgggtcccccggtcccggcggggggcggggcggcggccggcctcgggtc-gccctcccctggccgctcgtgtggcgtgtgccaccctcggcccgcggccggcggggtcggagcc 3118
human_rDNA ctgcggcccggcgcgggtcccccggtcccggcggggggcggggcggcggccggcctcgggtc-gccctcccctggccgctcgtgtggcgtgtgccaccctcggcccgcggccggcggggtcggagcc 3118
          3,140          3,160          3,180          3,200          3,220          3,240
KY962518_1 gggctcggcccggccccgggcccctcggaccggaccgggtcggcggggcgtcggcggccgaccggcggactgtccccgggcccgggaccggcgttcccctctcgtcgcggccggagctcggggcggccccg 3248
human_rDNA gggctcggcccggccccgggcccctcggaccggaccgggtcggcggggcgtcggcggccgaccggcggactgtccccgggcccgggaccggcgttcccctctcgtcgcggccggagctcggggcggccccg 3249
          3,260          3,280          3,300          3,320          3,340          3,360          3,380
KY962518_1 cggggcggggcggagcggcgtccccgcctcggcggccccggggcggcggccggcggcggcgtggcggccgggtcccctcccggcggcggggcggcgggtcggggcggtccgcctctcgcggggcgggc 3378
human_rDNA cggggcggggcggagcggcgtccccgcctcggcggccccggggcggcggccggcggcggcgtggcggccgggtcccctcccggcggcggggcggcgggtcggggcggtccgcctctcgcggggcgggc 3379
          3,400          3,420          3,440          3,460          3,480          3,500
KY962518_1 gcgacgaagaagcgtcgggggtctgtggcggggggccccgggtggtcgtgtcggcgtggggggcgggtgggttggggcgtccgttccggcggccccggccccaccgggtcccggccggccccggcg 3508
human_rDNA gcgacgaagaagcgtcgggggtctgtggcggggggccccgggtggtcgtgtcggcgtggggggcgggtgggttggggcgtccgttccggcggccccggccccaccgggtcccggccggccccggcg 3509
          3,520          3,540          3,560          3,580          3,600          3,620          3,640
KY962518_1 ccgcctcgtcctcccgtccgcccgtccgcggccccgtccgtccgtccgtccgtccctcgtctcggggcggcggcccgctcctcggaggccccggcggcggcgtccggcggcgtcggggccct 3638
human_rDNA ccgcctcgtcctcccgtccgcccgtccgcggc -- ccgtccgtccgtccgtccgtccctcgtctcggggcggcggcccgctcctcggaggccccggcggcggcgtccggcggcgtcggggccct 3635
          3,660          3,680          3,700          3,720          3,740          3,760
KY962518_1 cgccggcctctacctacctacctgggtgattcctgccagtagcatatgcttctcctaaagattagccaatgcatgtctaagtacgacggccgggtacagtgaaactgcgaaatggctcattaaatcagttta 3768
human_rDNA cgccggcctctacctacctacctgggtgattcctgccagtagcatatgcttctcctaaagattagccaatgcatgtctaagtacgacggccgggtacagtgaaactgcgaaatggctcattaaatcagttta 3765
          3,780          3,800          3,820          3,840          3,860          3,880          3,900
KY962518_1 tggttcctttggtcgctcgtcctctcctacttggataaacttggtaatttcttagagctaatacatgccgacggggcgtgaccccccttccgggggggattgctgcatattatcagatcaaaaaccaaccgg 3898
human_rDNA tggttcctttggtcgctcgtcctctcctacttggataaacttggtaatttcttagagctaatacatgccgacggggcgtgaccccccttccgggggggattgctgcatattatcagatcaaaaaccaaccgg 3895
          3,920          3,940          3,960          3,980          4,000          4,020
KY962518_1 tcagccccctctcggccccggcggggggcggggcggcggcgttgggtgactctagataaacctcgggcccgatcgcacgccccccgtggcggcggacgacccattcgaacgtctgccctatcaactttcga 4028
human_rDNA tcagccccctctcggccccggcggggggcggggcggcggcgttgggtgactctagataaacctcgggcccgatcgcacgccccccgtggcggcggacgacccattcgaacgtctgccctatcaactttcga 4025
          4,040          4,060          4,080          4,100          4,120          4,140          4,160
KY962518_1 tggtagtgcgggtgcctaccaaggtagcaccgggtgacggggaaatcaggggttcgatccggagagggagcctgagaaacggctaccacatccaaggaaggcagcaggcggcaaaataccactcccgc 4158
human_rDNA tggtagtgcgggtgcctaccaaggtagcaccgggtgacggggaaatcaggggttcgatccggagagggagcctgagaaacggctaccacatccaaggaaggcagcaggcggcaaaataccactcccgc 4155

```

KY962518\_1 ccggggaggtagtgacgaaaaataacaatacaggactcttctcgaggccctgtaattggaatgagtcacctttaaactctttaaaggagatccattggagggcaagctctggtgccagcagccgcggtaatt 4288  
 human\_rDNA ccggggaggtagtgacgaaaaataacaatacaggactcttctcgaggccctgtaattggaatgagtcacctttaaactctttaaaggagatccattggagggcaagctctggtgccagcagccgcggtaatt 4285

KY962518\_1 ccagctccaatagcggtatataaagtgtcgtcagttaaaaagctcgtagttggatcttgggagcggcgggcggtccgcgcgagggcagaccacggcccgctcccgccccttgcctctcggcgccccctc 4418  
 human\_rDNA ccagctccaatagcggtatataaagtgtcgtcagttaaaaagctcgtagttggatcttgggagcggcgggcggtccgcgcgagggcagaccacggcccgctcccgccccttgcctctcggcgccccctc 4415

KY962518\_1 gatgctcttagctgagtgctcccgggggcccgaaagcgtttactttgaaaaaattagagtggttcaaagcagggcccgagccctggataccgcagctaggaaataaggaaataggaccggttctattttg 4548  
 human\_rDNA gatgctcttagctgagtgctcccgggggcccgaaagcgtttactttgaaaaaattagagtggttcaaagcagggcccgagccctggataccgcagctaggaaataaggaaataggaccggttctattttg 4545

KY962518\_1 ttggttttcggaactgagggccatgattaaagggagcggcgggggcatctcgtatttgcgccgtagaggtagaaatcttggaccggcgcaagacggaccagagcgaagcatttgccaagaaatgttttca 4678  
 human\_rDNA ttggttttcggaactgagggccatgattaaagggagcggcgggggcatctcgtatttgcgccgtagaggtagaaatcttggaccggcgcaagacggaccagagcgaagcatttgccaagaaatgttttca 4675

KY962518\_1 taatacaagaacgaaagtctggagggttcgaagacgatacagatccgctcgtagttccgaccataaaacgatgccgaccggcgatgcggcgggcgttatttcccatgaccccgccgggagcttccgggaaaccaaag 4808  
 human\_rDNA taatacaagaacgaaagtctggagggttcgaagacgatacagatccgctcgtagttccgaccataaaacgatgccgaccggcgatgcggcgggcgttatttcccatgaccccgccgggagcttccgggaaaccaaag 4805

KY962518\_1 tctttgggttccggggggagtaggttgcacaaagctgaaacttaaaggaaatgacggaaggccaccaccaggagtgaggcctgcggcttaatttgactcaaacacgggaaacctcaccggccccggacacgg 4938  
 human\_rDNA tctttgggttccggggggagtaggttgcacaaagctgaaacttaaaggaaatgacggaaggccaccaccaggagtgaggcctgcggcttaatttgactcaaacacgggaaacctcaccggccccggacacgg 4935

KY962518\_1 acaggattgacagattgatagctcttctcgtattccgtgggtgggtgcatggccgttcttagttgggtggagcatttgcctgggttaattccgataaacgaacgagactctggcatgctaactagttacg 5068  
 human\_rDNA acaggattgacagattgatagctcttctcgtattccgtgggtgggtgcatggccgttcttagttgggtggagcatttgcctgggttaattccgataaacgaacgagactctggcatgctaactagttacg 5065

KY962518\_1 cgacccccgagcggctcggcgtcccccaacttcttagagggaacaagtggcgttcagccaccggagattgagcaataaacaggctctgtatgaccttagatgtcgggggtgcacgcgcgtacactgactgg 5198  
 human\_rDNA cgacccccgagcggctcggcgtcccccaacttcttagagggaacaagtggcgttcagccaccggagattgagcaataaacaggctctgtatgaccttagatgtcgggggtgcacgcgcgtacactgactgg 5195

KY962518\_1 ctcagcgtgtgcctaccctacgccggcagggcgcgggtaacccttgaaccccaattcgtgtaggggatcggggattgcaattatccccaagaacgaggaattcccagtaagtgcgggtcataagcttgcg 5328  
 human\_rDNA ctcagcgtgtgcctaccctacgccggcagggcgcgggtaacccttgaaccccaattcgtgtaggggatcggggattgcaattatccccaagaacgaggaattcccagtaagtgcgggtcataagcttgcg 5325

KY962518\_1 ttgattaagtccctgccctttgtacacacggcccgctcgtactaccgattggatgggttagtgaggccctcggatcggcccccgccgggtcggccccacggccctggcggagcgtgagaagacgggtcgaa 5458  
 human\_rDNA ttgattaagtccctgccctttgtacacacggcccgctcgtactaccgattggatgggttagtgaggccctcggatcggcccccgccgggtcggccccacggccctggcggagcgtgagaagacgggtcgaa 5455

KY962518\_1 cttgactatctagaggaaagtaaaagtctgtaacaaggtttccgtaggtgaaacctgcggaaggatcattaaacggagccggagggcgagggccccggcggg - - - cgccgccggcggcgttccctccgcaca 5585  
 human\_rDNA cttgactatctagaggaaagtaaaagtctgtaacaaggtttccgtaggtgaaacctgcggaaggatcattaaacggagccggagggcgagggccccggcggg - - - cgccgccggcggcgttccctccgcaca 5585

KY962518\_1 cccacccccccaccgcgacgcggcgcgtgcgcggggcggggcccgctgcccgttctgctcgtcgttctgctcgcgcgttctgctcgcgcgcggcccgccggcggcgagagccggagaaactcgggagggagacggggga 5715  
 human\_rDNA cccacccccccaccgcgacgcggcgcgtgcgcggggcggggcccgctgcccgttctgctcgtcgttctgctcgcgcgttctgctcgcgcgcggcccgccggcggcgagagccggagaaactcgggagggagacggggga 5715

KY962518\_1 gagagagagagagagagaaagagaagggcgttctggttggctgctgctggtggggccggcggggcgggggagcgggtccccggcagcggcccccagcggcgtgggttgcggcggcgcgggggcg 5845  
 human\_rDNA gagagagagagagagagaaagagaagggcgttctggttggctgctgctggtggggccggcggggcgggggagcgggtccccggcagcggcccccagcggcgtgggttgcggcggcgcgggggcg 5845

KY962518\_1 gttctcggcggcgtcgcggcgggttct - - gggggctcgggtgccctcctccccggcggggcccgctcgtcggcccccgccggcggcgtccccgtcttccggggcggcgggattccccgtcgcctcggcggcg 5973  
 human\_rDNA gttctcggcggcgtcgcggcgggttct - - gggggctcgggtgccctcctccccggcggggcccgctcgtcggcccccgccggcggcgtccccgtcttccggggcggcgggattccccgtcgcctcggcggcg 5975

KY962518\_1 ccgctcggcggcggcgggacggccccgctcgcctcctcccgccctcggcgttagggcgtcgcagggtcggggggcggagcggcgtccccctccccggcctcctcgtcggcccccccgctccaggtaacc 6103  
 human\_rDNA ccgctcggcggcggcgggacggccccgctcgcctcctcccgccctcggcgttagggcgtcgcagggtcggggggcggagcggcgtccccctccccggcctcctcgtcggcccccccgctccaggtaacc 6105

KY962518\_1 tagcgcgttccggcggagggtttaaagacccccctggggggaatgcgccgtccgcccgtgggtcggggggcgtgggtggggccggggggagttcccgctcgggagggggccggccccctcccgccctccaccg 6233  
 human\_rDNA tagcgcgttccggcggagggtttaaagacccccctggggggaatgcgccgtccgcccgtgggtcggggggcgtgggtggggccggggggagttcccgctcgggagggggccggccccctcccgccctccaccg 6235

|            |                                                                                                                                          |       |  |       |  |       |  |       |  |       |  |       |       |
|------------|------------------------------------------------------------------------------------------------------------------------------------------|-------|--|-------|--|-------|--|-------|--|-------|--|-------|-------|
|            |                                                                                                                                          | 6,260 |  | 6,280 |  | 6,300 |  | 6,320 |  | 6,340 |  | 6,360 |       |
| KY962518_1 | cggactccgctccccggcgggggcggcgcggccggccgcccggcggggccttaccggcgccgctcgcgcgctgcccggcgctgggggctttaccggcgccgctcgcgcgctgcccggcgctggggggcgggaa    |       |  |       |  |       |  |       |  |       |  |       | 6363  |
| human_rDNA | cggactccgctccccggcgggggcggcgcggccggccgcccggcggggccttaccggcgccgctcgcgcgctgcccggcgctggggggcgggaa                                           | 6,380 |  | 6,400 |  | 6,420 |  | 6,440 |  | 6,460 |  | 6,480 | 6,500 |
| KY962518_1 | cccccgggcgctgtgggggggttccgcgctgcggccgctggggcgccggcctccccggggtgaaaccttcggaccccttccggagtccggtccggttggctgtctcgtctggccggccctga               |       |  |       |  |       |  |       |  |       |  |       | 6493  |
| human_rDNA | cccccgggcgctgtgggggggttccgcgctgcggccgctggggcgccggcctccccggggtgaaaccttcggaccccttccggagtccggtccggttggctgtctcgtctggccggccctga               |       |  |       |  |       |  |       |  |       |  |       | 6495  |
| KY962518_1 | ggcaaccccccttccctctggg-agggggggggggacgtgccgcgacaggagggtctctccggtgctgctcgggagcggcctcgccaaatcgacctctgtacgactcttagcgtggatcactcgg            |       |  |       |  |       |  |       |  |       |  |       | 6621  |
| human_rDNA | ggcaaccccccttccctctggg-agggggggggggacgtgccgcgacaggagggtctctccggtgctgctcgggagcggcctcgccaaatcgacctctgtacgactcttagcgtggatcactcgg            | 6,520 |  | 6,540 |  | 6,560 |  | 6,580 |  | 6,600 |  | 6,620 | 6,625 |
| KY962518_1 | ctcgtgcgtcgtgtaagaacgcagctagctgcgagaataatgtgaattgcaggacacattgatactgacacttcgaacgcacttcggccccgggttctccggggctacgcctgtctgagcgtctgc           |       |  |       |  |       |  |       |  |       |  |       | 6751  |
| human_rDNA | ctcgtgcgtcgtgtaagaacgcagctagctgcgagaataatgtgaattgcaggacacattgatactgacacttcgaacgcacttcggccccgggttctccggggctacgcctgtctgagcgtctgc           | 6,640 |  | 6,660 |  | 6,680 |  | 6,700 |  | 6,720 |  | 6,740 | 6,760 |
| KY962518_1 | ttgccgatacaatcgccccgggggtgcccgcggggctcctcggggtgcgccccgggggttcccctgcaggggcccggggggccctcggctccccctaaagcgcagaccggcgcggtccgccctcctcttg       |       |  |       |  |       |  |       |  |       |  |       | 6881  |
| human_rDNA | ttgccgatacaatcgccccgggggtgcccgcggggctcctcggggtgcgccccgggggttcccctgcaggggcccggggggccctcggctccccctaaagcgcagaccggcgcggtccgccctcctcttg       | 6,900 |  | 6,920 |  | 6,940 |  | 6,960 |  | 6,980 |  | 7,000 | 7,020 |
| KY962518_1 | ccgccgcccgcggcccttccccct-cggcgccccctcgctggttcacgctgccccggggggggagagggggcggcggcggctgagagagaccggggagggcggcgccgcggccggcgaagac               |       |  |       |  |       |  |       |  |       |  |       | 7010  |
| human_rDNA | ccgccgcccgcggcccttccccct-cggcgccccctcgctggttcacgctgccccggggggggagagggggcggcggcggctgagagagaccggggagggcggcgccgcggccggcgaagac               |       |  |       |  |       |  |       |  |       |  |       | 7015  |
| KY962518_1 | ggagaggggaaagagagagaccggctcgggccccgagtccccgtggcccgcggcctcgggtccgggttcccctcgggggggctcccctcggcggcggcggcggcctcggggttcggggttcgttgcggcccgccgg |       |  |       |  |       |  |       |  |       |  |       | 7140  |
| human_rDNA | ggagaggggaaagagagagaccggctcgggccccgagtccccgtggcccgcggcctcgggtccgggttcccctcgggggggctcccctcggcggcggcggcggcctcggggttcggggttcgttgcggcccgccgg | 7,040 |  | 7,060 |  | 7,080 |  | 7,100 |  | 7,120 |  | 7,140 | 7,145 |
| KY962518_1 | tggaaggttccgctgcc--cgtcgtcgtcgtcgtcgcgctcgtcggcggtgggggctgttggctgcgggttgggtgggggaggaggaagcggggtccggaaggggaaagggttcgccgggggagaga          |       |  |       |  |       |  |       |  |       |  |       | 7267  |
| human_rDNA | tggaaggttccgctgcc--cgtcgtcgtcgtcgtcgcgctcgtcggcggtgggggctgttggctgcgggttgggtgggggaggaggaagcggggtccggaaggggaaagggttcgccgggggagaga          | 7,160 |  | 7,180 |  | 7,200 |  | 7,220 |  | 7,240 |  | 7,260 | 7,280 |
| KY962518_1 | gggtcggggagcgctccccgtcgcggcgggttcgcccggccggccgggtggcgcccgcgctcggcggaccgcccgtcccggccccctcctcctcccccgcccccctcctccgagggccccgcggctc          |       |  |       |  |       |  |       |  |       |  |       | 7397  |
| human_rDNA | gggtcggggagcgctccccgtcgcggcgggttcgcccggccggccgggtggcgcccgcgctcggcggaccgcccgtcccggccccctcctcct-cggcgccccctcctccgagggccccgcggctc           | 7,300 |  | 7,320 |  | 7,340 |  | 7,360 |  | 7,380 |  | 7,400 | 7,404 |
| KY962518_1 | ctcctcggcctcccccgcgctaccggcggcggcggccccggcggcctcggcctcggggcggctcggccccggggcgggagcccggcccccgggcggcggcggcggggttgcg                         |       |  |       |  |       |  |       |  |       |  |       | 7527  |
| human_rDNA | ctcctcggcctcccccgcgctaccggcggcggcggccccggcggcctcggcctcggggcggctcggccccggggcgggagcccggcccccgggcggcggcggcggggttgcg                         | 7,420 |  | 7,440 |  | 7,460 |  | 7,480 |  | 7,500 |  | 7,520 | 7,540 |
| KY962518_1 | gtgtccccggcggggaccgccccggggacgcccgggttcgctccggcgtcgcgcggcggcctccggctcggggcggcggcggcggcggcggcggcggcccggtcccgagcttccgctcggggcgggcgggcctccg |       |  |       |  |       |  |       |  |       |  |       | 7657  |
| human_rDNA | gtgtccccggcggggaccgccccggggacgcccgggttcgctccggcgtcgcgcggcggcctccggctcggggcggcggcggcggcggcggcggcggcccggtcccgagcttccgctcggggcgggcgggcctccg | 7,680 |  | 7,700 |  | 7,720 |  | 7,740 |  | 7,760 |  | 7,780 | 7,800 |
| KY962518_1 | ccgccgcttctcggacccgtcccccgacctccggggggagacgggtcggggcgtcggggcggcggccggtcccgccccggcccgtgccccctcctcggctcgttcccgctcggcgggggcgggcggggtg       |       |  |       |  |       |  |       |  |       |  |       | 7787  |
| human_rDNA | ccgccgcttctcggacccgtcccccgacctccggggggagacgggtcggggcgtcggggcggcggccggtcccgccccggcccgtgccccctcctcggctcgttcccgctcggcgggggcgggcggggtg       | 7,820 |  | 7,840 |  | 7,860 |  | 7,880 |  | 7,900 |  | 7,920 | 7,990 |
| KY962518_1 | ccctcggcgcg-gctctcttccccgtcggccttccccctcggcggggcccgttcccgaaggagcgtcggcggggctcggggccggcggcgaattcgttccgtccgctcggcggaggcgctccccctcc         |       |  |       |  |       |  |       |  |       |  |       | 7916  |
| human_rDNA | ccctcggcgcg-gctctcttccccgtcggccttccccctcggcggggcccgttcccgaaggagcgtcggcggggctcggggccggcggcgaattcgttccgtccgctcggcggaggcgctccccctcc         | 7,940 |  | 7,960 |  | 7,980 |  | 8,000 |  | 8,020 |  | 8,040 | 8,060 |
| KY962518_1 | gagacggaccctcagatcagacgtggcgaccccgtgaatttaagcattatagttagcgggagggaaaagaaactaacagggaattccctcagtaaccggcagtgaaacagggaaagagcccagcggcaatccc    |       |  |       |  |       |  |       |  |       |  |       | 8046  |
| human_rDNA | gagacggaccctcagatcagacgtggcgaccccgtgaatttaagcattatagttagcgggagggaaaagaaactaacagggaattccctcagtaaccggcagtgaaacagggaaagagcccagcggcaatccc    | 8,080 |  | 8,100 |  | 8,120 |  | 8,140 |  | 8,160 |  | 8,180 | 8050  |
| KY962518_1 | gccccggggggcggggacaattgcttacggaagaccgctccccggcggcgtcgtggggggcccaagcttctctgactcagggccagcccgtggacgggtgtagggcgggttagcggcccccgcg             |       |  |       |  |       |  |       |  |       |  |       | 8176  |
| human_rDNA | gccccggggggcggggacaattgcttacggaagaccgctccccggcggcgtcgtggggggcccaagcttctctgactcagggccagcccgtggacgggtgtagggcgggttagcggcccccgcg             | 8,200 |  | 8,220 |  | 8,240 |  | 8,260 |  | 8,280 |  | 8,300 | 8,320 |
| KY962518_1 | cgccggggcgggtcttccccgggtcgggttgccttgggaatgcagcccaaagcgggtgtttaaactccttctaaaggctaaaaccggcacgagaccgatagtcaacaagtaccgtaagggaagttgaaa        |       |  |       |  |       |  |       |  |       |  |       | 8306  |
| human_rDNA | cgccggggcgggtcttccccgggtcgggttgccttgggaatgcagcccaaagcgggtgtttaaactccttctaaaggctaaaaccggcacgagaccgatagtcaacaagtaccgtaagggaagttgaaa        |       |  |       |  |       |  |       |  |       |  |       | 8310  |

```

        8,340               8,360               8,380               8,400               8,420               8,440
KY962518_1 gaactt tgaagagagagt tcaagagggcg tgaaccggt taagaggtaaacgggtgggggtccgcgcagtccgcccggagga tcaaccggcggggtccggccgtg tccggcgcccgggcgga tctttcc 8436
human_rDNA gaactt tgaagagagagt tcaagagggcg tgaaccggt taagaggtaaacgggtgggggtccgcgcagtccgcccggagga tcaaccggcggggtccggccgtg tccggcgcccgggcgga tctttcc 8440
        8,460               8,480               8,500               8,520               8,540               8,560               8,580
KY962518_1 cgccccccg t t cctccc g acccct ccaacc g cccctccct t cccccg ccgccc t cctc t cctc cccggaggggggcggc t cggcgggg tgcggggg tggggcggg cggggg tgggg tccgcccc 8566
human_rDNA cgccccccg t t cctccc g acccct ccaacc g cccctccct t cccccg ccgccc t cctc t cctc cccggaggggggcggc t cggcgggg tgcggggg tggggcggg cggggg tgggg tccgcccc 8570
        8,600               8,620               8,640               8,660               8,680               8,700
KY962518_1 ggaccgt tccccgaccggcgaaccggcgcggcgccggcgccgt t tccaaccg g cgggtg cgcggcgaaccgctcggggaaggctgggaagcccggggggaaaggtggctcggggggc cccgtccgtccc 8696
human_rDNA ggaccgt tccccgaccggcgaaccggcgcggcgccggcgccgt t tccaaccg g cgggtg cgcggcgaaccgctcggggaaggctgggaagcccggggggaaaggtggctcggggggc cccgtccgtccc 8700
        8,720               8,740               8,760               8,780               8,800               8,820               8,840
KY962518_1 cgtccgt tccctcctccccgtc tccgccccccggcccgcg t cctc cctc gggagggcg cgcgggtcgg - - - - - g cgcgcggcg cgg tggcgcg cggcggcg cggcggcg cgggac cggaa - ccccc 8819
human_rDNA cgtccgt tccctcctccccgtc tccgccccccggcccgcg t cctc cctc gggagggcg cgcgggtcgg gggcg cggcggcggcg cggcggcg cgggac cggaa - ccccc 8830
        8,860               8,880               8,900               8,920               8,940               8,960
KY962518_1 cgagtg t ttaacagccccccccggcagcagca t cgcggaatcccgggg ccgaggggagcga g acccgtcgcggcg cgtc tccccctcccggcggccacc ccccgggggaatcccccgcgagggggg tctccc 8949
human_rDNA cgagtg t ttaacagccccccccggcagcagca t cgcggaatcccgggg ccgaggggagcga g acccgtcgcggcg cgtc tccccctcccggcggccacc ccccgggggaatcccccgcgagggggg tctccc 8960
        8,980               9,000               9,020               9,040               9,060               9,080               9,100
KY962518_1 cgcggggcg cgcggcg tctcctc g tggggggggcggggccaccctcccacggcgcgaaccgctc tcccacccctcctcccccggcggcccccggcccgcgacggggggg tgcggcg cgcgggtcgggggg 9079
human_rDNA cgcggggcg cgcggcg tctcctc g tggggggggcggggccaccctcccacggcgcgaaccgctc tcccacccctcctcccccggcggcccccggcccgcgacggggggg tgcggcg cgcgggtcgggggg 9090
        9,120               9,140               9,160               9,180               9,200               9,220
KY962518_1 cgggcg gactgtccccag tgc cccccggcggg tgcgc cgtcgggccccggggggag g t tctc tggggccacgcg cgcgtcccccgaagaggggggacggcggagc gacgcagggtcggcggcgac 9209
human_rDNA cgggcg gactgtccccag tgc cccccggcggg tgcgc cgtcgggccccggggggag g t tctc tggggccacgcg cgcgtcccccgaagaggggggacggcggagc gacgcagggtcggcggcgac 9219
        9,240               9,260               9,280               9,300               9,320               9,340               9,360
KY962518_1 gtcggctaccaccccgaccgtct t gaaacacggaccaaggagt ttaacacg tgcgcg agtgcgggggtc g caccgaaaggcccg tggcgaa t gaagg tgaaggcggcgcgctgc cggccgagg tgg 9339
human_rDNA gtcggctaccaccccgaccgtct t gaaacacggaccaaggagt ttaacacg tgcgcg agtgcgggggtc g caccgaaaggcccg tggcgaa t gaagg tgaaggcggcgcgctgc cggccgagg tgg 9349
        9,380               9,400               9,420               9,440               9,460               9,480
KY962518_1 gatccccgaggcctctcag tccgc cggaggcgaccaccggccccgtc tgcgccgcgcg cggggaggtggagcacgagcgcacg t g t taggacccgaaaga tgg t gaacta tgcctgggcagggcgaa g 9469
human_rDNA gatccccgaggcctctcag tccgc cggaggcgaccaccggccccgtc tgcgccgcgcg cggggaggtggagcacgagcgcacg t g t taggacccgaaaga tgg t gaacta tgcctgggcagggcgaa g 9479
        9,500               9,520               9,540               9,560               9,580               9,600               9,620
KY962518_1 ccagaggaaaactctgg tggagg tccgt agcgg tcc t gacg t gcaaatcgg t c g tccgacctgggtat agggggcgaagactaatcgaacca tct ag tagc tgg tccctccgaag t tccctcaggga tag 9599
human_rDNA ccagaggaaaactctgg tggagg tccgt agcgg tcc t gacg t gcaaatcgg t c g tccgacctgggtat agggggcgaagactaatcgaacca tct ag tagc tgg tccctccgaag t tccctcaggga tag 9609
        9,640               9,660               9,680               9,700               9,720               9,740
KY962518_1 ctggcgctc tgcgac accgcacc ccccgccacgcgag t t t atcgggtaaaagcgaatgattagagg tcttggggccgaaacgat tcaacctattctcaaa t taaa tgggtaagaagccccggtc g 9729
human_rDNA ctggcgctc tgcgac accgcacc ccccgccacgcgag t t t atcgggtaaaagcgaatgattagagg tcttggggccgaaacgat tcaacctattctcaaa t taaa tgggtaagaagccccggtc g 9739
        9,760               9,780               9,800               9,820               9,840               9,860               9,880
KY962518_1 ctggcg tgg agcggcg tggaa tgcg agtgcct ag tgggccact t t gg taa gcagaac tggcgc tgcggg atgaa ccgaa cgcggg ttaaggcccgatg ccgacgctcatcagacccagaaaa g 9859
human_rDNA ctggcg tgg agcggcg tggaa tgcg agtgcct ag tgggccact t t gg taa gcagaac tggcgc tgcggg atgaa ccgaa cgcggg ttaaggcccgatg ccgacgctcatcagacccagaaaa g 9869
        9,900               9,920               9,940               9,960               9,980               10,000
KY962518_1 g t g t t g g t g a t a t a g a c a g c a g g a c g g t g g c c a t g g a a t c c g c t a a g g a g t g t g t a a c a a c t a c c t g c c g a a t c a a c t a g c c t g a a a a t g g a t g g c g t g g a g c g t c g g c c c a t a c c c g 9989
human_rDNA g t g t t g g t g a t a t a g a c a g c a g g a c g g t g g c c a t g g a a t c c g c t a a g g a g t g t g t a a c a a c t a c c t g c c g a a t c a a c t a g c c t g a a a a t g g a t g g c g t g g a g c g t c g g c c c a t a c c c g 9999
        10,020               10,040               10,060               10,080               10,100               10,120               10,140
KY962518_1 gccgtcgcggcag t cgag agtggacggggagcggcgggggcgggcg cgcgcgcg cgcgcg cgtg tgg t g t g c g t c g g a g g c g g c g g c g g c g g g - - - - - g g t g t g g g g t c c t c c c c - - - - - c g c c c c c c c c 10112
human_rDNA gccgtcgcggcag t cgag agtggacggggagcggcgggggcgggcg cgcgcgcg cgcgcg cgtg tgg t g t g c g t c g g a g g c g g c g g c g g c g g c g g c g g c g g c g g c g g g g g g t g t g g g t c c t c c c c c g c c c c c c c c 10129
        10,160               10,180               10,200               10,220               10,240               10,260
KY962518_1 cacgcctcctcccctcctcccgc cccacgcccgcctcccgc cccccggagcccgcggcagctacgcgcgcgacgagtaggaggggcgc tgcggtgagcct t gaagcctagggcg cgggccgggtggagcc 10242
human_rDNA cacgcctcctcccctcctcccgc cccacgcccgcctcccgc cccccggagcccgcggcagctacgcgcgcgacgagtaggaggggcgc tgcggtgagcct t gaagcctagggcg cgggccgggtggagcc 10259
        10,280               10,300               10,320               10,340               10,360               10,380               10,400
KY962518_1 gccgcagg tgcagatct tgg tgg tagtagcaaa t t tcaaacg gaaact t tgaaggccgaagtggagaa ggg tcca t g t g a a c a g c a g t t g a a c a t g g g t c a g t c g g t c c t g a g a g a t g g g c g a g c g c 10372
human_rDNA gccgcagg tgcagatct tgg tgg tagtagcaaa t t tcaaacg gaaact t tgaaggccgaagtggagaa ggg tcca t g t g a a c a g c a g t t g a a c a t g g g t c a g t c g g t c c t g a g a g a t g g g c g a g c g c 10389

```

KY962518\_1 human\_rDNA 10,420 10,440 10,460 10,480 10,500 10,520  
 g t t c t g a a g g a c g g g c g a t g g c c t c c g t t g c c c t c g g c c g a t c g a a a g g g a g t c g g g t t c a g a t c c c c g a a t c c g g a g t g g c g g a g a t g g g c g c c g c g a g g c g t c c a g t g c g g t a a c g c g a c c g a t c c c 10502  
 g t t c c g a a g g g a c g g g c g a t g g c c t c c g t t g c c c t c g g c c g a t c g a a a g g g a g t c g g g t t c a g a t c c c c g a a t c c g g a g t g g c g g a g a t g g g c g c c g c g a g g c g t c c a g t g c g g t a a c g c g a c c g a t c c c 10519  
 10,540 10,560 10,580 10,600 10,620 10,640 10,660  
 KY962518\_1 human\_rDNA g g a g a a g c c g g c g g g a g c c c c g g g g a g a g t t c t c t t t t c t t g t g a a g g g c a g g g c g c c t g g a a t g g g t t c g c c c c g a g a g a g g g g c c g t g c c t t g g a a a g c g t c g c g g t t c c g g c g g c g t c c g g t g a 10632  
 g g a g a a g c c g g c g g g a g c c c c g g g g a g a g t t c t c t t t t c t t g t g a a g g g c a g g g c g c c t g g a a t g g g t t c g c c c g a g a g a g g g c c c g t g c c t t g g a a a g c g t c g c g g t t c c g g c g g c g t c c g g t g a 10649  
 10,680 10,700 10,720 10,740 10,760 10,780  
 KY962518\_1 human\_rDNA g c t c t c g t g g c c c t t g a a a a t c c g g g g g a g a g g g t g t a a a t c t c g c g c c g g g c c g t a c c c a t a t c c g c a g c a g g t t c c a a g g t g a a c a g c c t c t g g c a t g t t g g a a c a a t g t a g g t a a g g g a a g t c g g 10762  
 g c t c t c g t g g c c c t t g a a a a t c c g g g g g a g a g g g t g t a a a t c t c g c g c c g g g c g t a c c c a t a t c c g c a g c a g g t t c c a a g g t g a a c a g c c t c t g g c a t g t t g g a a c a a t g t a g g t a a g g g a a g t c g g 10779  
 10,800 10,820 10,840 10,860 10,880 10,900 10,920  
 KY962518\_1 human\_rDNA c a a g c c g g a t c c g t a a c t t c g g g a t a a g g a t t g g c t c t a a g g g c t g g t c g g t c g g g c t g g g g c g c g a a g c g g g g c t g g g c g c g c c g c g c g g c t g g a c g a g g c g c c g c c g c c c c c c a c g c c c g g g g c a 10892  
 c a a g c c g g a t c c g t a a c t t c g g g a t a a g g a t t g g c t c t a a g g c t g g t c g g t c g g g c t g g g g c g c g a a g c g g g g c t g g g c g c g c c g c g c g g c t g g a c g a g g c g c c g c c c c c c a c g c c c c g g g g c a 10909  
 10,940 10,960 10,980 11,000 11,020 11,040  
 KY962518\_1 human\_rDNA c c c c c t c g c g g c c c t c c c c g c c c c a c c c g c g c g c g c g t c g t c c c t c c c a c c c c g c g c c t c t c t c t c t c t c t c c c c c g c t c c c c g t c c t c c c c c t c c c c g g g g a g c g c c g c t g g g g c 11022  
 c c c c c t c g c g g c c c t c c c c g c c c c a c c c g c g c g c g c g t c g t c c c t c c c c c g c c c c g c g c c t c t c t c t c t c t c t c c c c g c t c c c c g t c c t c c c c c t c c c c g g g g a g c g c c g c t g g g g c 11039  
 11,060 11,080 11,100 11,120 11,140 11,160 11,180  
 KY962518\_1 human\_rDNA g g c g g c g g g g g a g a a g g t c g g g g c g c a g g g c c g g c g g c g g - c g c c g c g g g g c c c c g g c g g g g g c a c g g t c c c c c g a g a g g g g c c g g g c a c c c g g g g g c g g c g g c g g c g a c t c t g 11151  
 g g c g g c g g g g g a g a a g g t c g g g g c g c a g g g c c g g c g g c g g c c g c g g g g c c c c g g c g g g g g c a c g g t c c c c c g a g a g g g g c c g g g c a c c c g g g g g c g g c g g c g g c g a c t c t g 11169  
 11,200 11,220 11,240 11,260 11,280 11,300  
 KY962518\_1 human\_rDNA g a c g c g a c c g g g c c c t t c c g t g g a t c g c c c c a g c t g c g g c g g g c g t c g c g g c g c c c c g g g a g c c c g g c g g c c g g c g g c - c c c c c c c c c a c c c a c g t c t c g t c g c g c g c g g t c c g t g g g 11280  
 g a c g c g a c c g g g c c c t t c c g t g g a t c g c c c c a g c t g c g g c g g g c g t c g c g c g c c c c c c c c c c c c c a c c c a c g t c t c g t c g c g c g c g t c c g t g g g 11299  
 11,320 11,340 11,360 11,380 11,400 11,420 11,440  
 KY962518\_1 human\_rDNA g g c g g g a g c g g t c g g g c g g c g g g t g g c g g g c g g c g g g g g g g g g t t c g t c c c c c g c c c t a c c c c c c g g c c c g t c g c c c c c g t t c c c c c t c c t c c t c g g e g c g g g c g g c g g c g g c g g c g g c g g c - - 11408  
 g g c g g g a g c g g t c g g g c g g c g g g t g g c g g g c g g c g g g g g g g g g t t c g t c c c c c g c c c t a c c c c c c g c c c c g t c g c c c c c g t t c c c c c t c c t c c t c g g e g c g g g c g g c g g c g g c g g c g g c g g c g g c 11429  
 11,460 11,480 11,500 11,520 11,540 11,560  
 KY962518\_1 human\_rDNA - g g c g g c g a g g g g c c g g g c g g t c c c c c c g c g g g t c c g c c c c g g g c g g t t c c g c g g c g c c t c g c c t c g g c c g g c c t a g c a g c c a c t t a g a a c t g g t g c g g a c a g g g g a a t c c g a 11537  
 a g g c g c g g a g g g g c c g g g c g g t c c c c c c g c g g g t c c g c c c c g g g c c g c g g t t c c g c g g g c c t c g c c t c g g c g g c c t a g a a c t g g t g c g g a c a g g g g a a t c c g a 11559  
 11,580 11,600 11,620 11,640 11,660 11,680 11,700  
 KY962518\_1 human\_rDNA c t g t t a a t t a a a a a a g c a t c g c g a a g c c c g c g g c g g t g t t g a c g c a t g t g a t t t c t g c c c a g t g c t c t g a a t g t c a a a g t a a g a a a t t c a a t g a a g c g c g g g t a a a c g g c g g g a t a a c t a t g 11667  
 c t g t t a a t t a a a a a a a g c a t c g c g a a g c c c g c g g c g g t g t t g a c g c a t g t g a t t t c t g c c c a g t g c t c t g a a t g t c a a a g t a a g a a a t t c a a t g a a g c g c g g g t a a a c g g c g g g a t a a c t a t g 11689  
 11,720 11,740 11,760 11,780 11,800 11,820  
 KY962518\_1 human\_rDNA a c t c t c t a a g g t a g c c a a a t g c c t c g t c a t c t a a t t a g t g a c g c g a t g a a t g g a t g a a c a g a g a t t c c a c t g t c c c t a c c t a c t a t c c a g c g a a a c c a c a g c c a a g g g a a c g g g c t g g c g g a a t c a g 11797  
 a c t c t c t a a g g t a g c c a a a t g c c t c g t c a t c t a a t t a g t g a c g c g a t g a a t g g a t g a a c a g a g a t t c c a c t g t c c c t a c c t a c t a t c c a g c g a a a c c a c a g c c a a g g g a a c g g g c t g g c g g a a t c a g 11819  
 11,840 11,860 11,880 11,900 11,920 11,940 11,960  
 KY962518\_1 human\_rDNA c g g g a a a g a a g a c c c t g t t g a g c t t g a c t c t a g t c t g g c a c g g t a a g a g a c a t g a g a g g t g a g a a a a g t g g g a g g c c c c c g g c g c c c c c c g g t t c c c c g c a g a g g g c c c g g g c g g g t c c g c c 11927  
 c g g g a a a g a a g a c c c t g t t g a g c t t g a c t c t a g t c t g g c a c g g t a a g a g a c a t g a g a g g t g a g a a a a g t g g g a g g c c c c c g g c g c c c c c c g g t t c c c c g c a g a g g g c c c g g g c g g g t c c g c c 11949  
 11,980 12,000 12,020 12,040 12,060 12,080  
 KY962518\_1 human\_rDNA g g c c c t g c g g g c c g c c g g t g a a a t a c c a c t a c t c t g a t c g t t t t t t a c t g a c c c g g t g a g g c g g g g g c g a g c c c c g a g g g g c t c t c g c t t c t g g c c a a g c c c c g g c c g c g c c g g c c g g g c g 12057  
 g g c c c t g c g g g c c g c c g g t g a a a t a c c a c t a c t c t g a t c g t t t t t t a c t g a c c c g g t g a g g c g g g g g c g a g c c c c g a g g g g c t c t c g c t t c t g g c c a a g c c c c g g c c g c g c c g g c c g g g c g 12079  
 12,100 12,120 12,140 12,160 12,180 12,200 12,220  
 KY962518\_1 human\_rDNA g a c c c g c t c c g g g a c a g t g c c a g g t g g g a g t t t g a c t g g g g c g g t a c a c c t g t c a a a c g g t a a c g a g g t g t c c t a a g g c g a g t c a g g g a g g a c a g a a a c c t c c c g t g g a g c a g a a g g g c a a a a g c t 12187  
 g a c c c g c t c c g g g a c a g t g c c a g g t g g g a g t t g a c t g g g g c g g t a c a c c t g t c a a a c g g t a a c g a g g t g t c c t a a g g c g a g t c a g g g a g g a c a g a a a c c t c c c g t g g a g c a g a a g g g c a a a a g c t 12209  
 12,240 12,260 12,280 12,300 12,320 12,340  
 KY962518\_1 human\_rDNA c g c t t g a t c t t g a t t t t c a g t a c g a a t a c a g a c c g t g a a a g c g g g g c t c a c g a t c c t t c t g a c c t t t t g g g t t t a a g c a g g a g g t g t c a g a a a g t t a c c a c a g g g a t a a c t g g c t t g t g c g g c c a a 12317  
 c g c t t g a t c t t g a t t t t c a g t a c g a a t a c a g a c c g t g a a a g c g g g g c t c a c g a t c c t t c t g a c c t t t t g g g t t t a a g c a g g a g g t g t c a g a a a g t t a c c a c a g g g a t a a c t g g c t t g t g c g g c c a a 12339  
 12,360 12,380 12,400 12,420 12,440 12,460 12,480  
 KY962518\_1 human\_rDNA g c g t t c a t a g c g a c t c g c t t t t g a t c c t c g a t g t c g g c t c t c c t a t c a t t g t g a a g c a g a a t t c a c c a a g c g t t g g a t t g t t c a c c c a c t a a t a g g g a a c g t g a g c t g g g t t t a g a c c g t c g t g a g 12447  
 g c g t t c a t a g c g a c t c g c t t t t g a t c c t c g a t g t c g g c t c t c c t a t c a t t g t g a a g c a g a a t t c a c c a a g c g t t g g a t t g t t c a c c c a c t a a t a g g g a a c g t g a g c t g g g t t t a g a c c g t c g t g a g 12469

|            |       |        |       |        |       |        |       |        |       |        |       |        |       |
|------------|-------|--------|-------|--------|-------|--------|-------|--------|-------|--------|-------|--------|-------|
| KY962518_1 | acagg | 12,500 | acagg | 12,520 | acagg | 12,540 | acagg | 12,560 | acagg | 12,580 | acagg | 12,600 | 12577 |
| human_rDNA | acagg | 12,620 | acagg | 12,640 | acagg | 12,660 | acagg | 12,680 | acagg | 12,700 | acagg | 12,720 | 12599 |
| KY962518_1 | gtggg | 12,760 | gtggg | 12,780 | gtggg | 12,800 | gtggg | 12,820 | gtggg | 12,840 | gtggg | 12,860 | 12706 |
| human_rDNA | gtggg | 12,760 | gtggg | 12,780 | gtggg | 12,800 | gtggg | 12,820 | gtggg | 12,840 | gtggg | 12,860 | 12729 |
| KY962518_1 | ctcca | 12,880 | ctcca | 12,900 | ctcca | 12,920 | ctcca | 12,940 | ctcca | 12,960 | ctcca | 12,980 | 12836 |
| human_rDNA | ctcca | 12,880 | ctcca | 12,900 | ctcca | 12,920 | ctcca | 12,940 | ctcca | 12,960 | ctcca | 12,980 | 12859 |
| KY962518_1 | gca   | 13,020 | gca   | 13,040 | gca   | 13,060 | gca   | 13,080 | gca   | 13,100 | gca   | 13,120 | 12966 |
| human_rDNA | gca   | 13,020 | gca   | 13,040 | gca   | 13,060 | gca   | 13,080 | gca   | 13,100 | gca   | 13,120 | 12989 |
| KY962518_1 | tgt   | 13,140 | tgt   | 13,160 | tgt   | 13,180 | tgt   | 13,200 | tgt   | 13,220 | tgt   | 13,240 | 13095 |
| human_rDNA | tgt   | 13,140 | tgt   | 13,160 | tgt   | 13,180 | tgt   | 13,200 | tgt   | 13,220 | tgt   | 13,240 | 13119 |
| KY962518_1 | -gtgg | 13,280 | -gtgg | 13,300 | -gtgg | 13,320 | -gtgg | 13,340 | -gtgg | 13,360 | -gtgg | 13,380 | 13224 |
| human_rDNA | -gtgg | 13,280 | -gtgg | 13,300 | -gtgg | 13,320 | -gtgg | 13,340 | -gtgg | 13,360 | -gtgg | 13,380 | 13249 |
| KY962518_1 | ccg   | 13,400 | ccg   | 13,420 | ccg   | 13,440 | ccg   | 13,460 | ccg   | 13,480 | ccg   | 13,500 | 13354 |
| human_rDNA | ccg   | 13,400 | ccg   | 13,420 | ccg   | 13,440 | ccg   | 13,460 | ccg   | 13,480 | ccg   | 13,500 | 13379 |
| KY962518_1 | gca   | 13,540 | gca   | 13,560 | gca   | 13,580 | gca   | 13,600 | gca   | 13,620 | gca   | 13,640 | 13484 |
| human_rDNA | gca   | 13,540 | gca   | 13,560 | gca   | 13,580 | gca   | 13,600 | gca   | 13,620 | gca   | 13,640 | 13509 |
| KY962518_1 | ccg   | 13,660 | ccg   | 13,680 | ccg   | 13,700 | ccg   | 13,720 | ccg   | 13,740 | ccg   | 13,760 | 13614 |
| human_rDNA | ccg   | 13,660 | ccg   | 13,680 | ccg   | 13,700 | ccg   | 13,720 | ccg   | 13,740 | ccg   | 13,760 | 13639 |
| KY962518_1 | ctc   | 13,800 | ctc   | 13,820 | ctc   | 13,840 | ctc   | 13,860 | ctc   | 13,880 | ctc   | 13,900 | 13744 |
| human_rDNA | ctc   | 13,800 | ctc   | 13,820 | ctc   | 13,840 | ctc   | 13,860 | ctc   | 13,880 | ctc   | 13,900 | 13769 |
| KY962518_1 | cgcc  | 13,920 | cgcc  | 13,940 | cgcc  | 13,960 | cgcc  | 13,980 | cgcc  | 14,000 | cgcc  | 14,020 | 13874 |
| human_rDNA | cgcc  | 13,920 | cgcc  | 13,940 | cgcc  | 13,960 | cgcc  | 13,980 | cgcc  | 14,000 | cgcc  | 14,020 | 13899 |
| KY962518_1 | tcag  | 14,060 | tcag  | 14,080 | tcag  | 14,100 | tcag  | 14,120 | tcag  | 14,140 | tcag  | 14,160 | 14004 |
| human_rDNA | tcag  | 14,060 | tcag  | 14,080 | tcag  | 14,100 | tcag  | 14,120 | tcag  | 14,140 | tcag  | 14,160 | 13947 |
| KY962518_1 | ctcg  | 14,180 | ctcg  | 14,200 | ctcg  | 14,220 | ctcg  | 14,240 | ctcg  | 14,260 | ctcg  | 14,280 | 14134 |
| human_rDNA | ctcg  | 14,180 | ctcg  | 14,200 | ctcg  | 14,220 | ctcg  | 14,240 | ctcg  | 14,260 | ctcg  | 14,280 | 13947 |
| KY962518_1 | ctct  | 14,320 | ctct  | 14,340 | ctct  | 14,360 | ctct  | 14,380 | ctct  | 14,400 | ctct  | 14,420 | 14264 |
| human_rDNA | ctct  | 14,320 | ctct  | 14,340 | ctct  | 14,360 | ctct  | 14,380 | ctct  | 14,400 | ctct  | 14,420 | 13947 |
| KY962518_1 | cctt  | 14,440 | cctt  | 14,460 | cctt  | 14,480 | cctt  | 14,500 | cctt  | 14,520 | cctt  | 14,540 | 14394 |
| human_rDNA | cctt  | 14,440 | cctt  | 14,460 | cctt  | 14,480 | cctt  | 14,500 | cctt  | 14,520 | cctt  | 14,540 | 13947 |
| KY962518_1 | ccg   | 14,560 | ccg   | 14,580 | ccg   | 14,600 | ccg   | 14,620 | ccg   | 14,640 | ccg   | 14,660 | 14524 |
| human_rDNA | ccg   | 14,560 | ccg   | 14,580 | ccg   | 14,600 | ccg   | 14,620 | ccg   | 14,640 | ccg   | 14,660 | 13947 |

















KY962518\_1 c t c t c t c t c t c a c t c a c t c t c t c t c c g t c t c t c t c t c t t t c t g t c t g t t t c t c t c t c t g t c t g t c t c t c t c c c c c a t g t c t c t c t c t c c c t c t c a c t c a c t c t c t c c g t c t c t c t c t c t t t 29151  
 human\_rDNA c t c t c t c t c t c a c t c a c t c t c t c t c c g t c t c t c t c t c t t t c t g t c t g t t t c t c t c t c t g t c t g t c t c t c t c c c c c a t g t c t c t c t c t c c c t c a t g t c t c t c t c t c t c t c t c t t t 28111

KY962518\_1 c t g t c t g t t t c t c t g t c t g t c t g t c t g t c t g t c t g t c t c t c t c t c t c t g t t t g t c t t t c t c c c t c c c t g t c t g t c t g t c t g t c t c t c t c t c t g t c t g t c t g t 29273  
 human\_rDNA c t g t c t g t t t c t c t g t c t g t c t g t c t g t c t g t c t g t c t c t c t c t c t c t c t c t c t c t g t t t g t c t t t c t c c c t c c c t g t c t g t c t g t c t g t c t c t c t c t c t g t c t g t c t g t 28241

KY962518\_1 c t c t c t c t t t t c t c t t t c t g t c t g t t t c t c t a t c t c t c g c t g t c c a t c t c t g t c t t t c t a t g t c t g t c t c t t t c t c t g t c a g t c t g t c a g a c a c c c c g t g c c g g t a g g g c c t g c c c t t c c a c g 29403  
 human\_rDNA c t c t c t c t t t t c t c t t t c t g t c t g t t t c t c t a t c t c t c g c t g t c c a t c t c t g t c t t t c t a t g t c t g t c t c t t t c t c t g t c a g t c t g t c a g a c a c c c c g t g c c g g t a g g g c c t g c c c t t c c a c g 28371

KY962518\_1 a g a g t g a g a a g c g c g t g c t t c g g t g c t t a g a g a g g c c g a g a g g a a t c t a g a c a g g c g g c c t t g c t g g g c t t c c c c a c t c g g t g t a c g a t t t c g g g a g g t c g a g g c c g g t c c c c g c t g g a t g c g a g g g 29533  
 human\_rDNA a g a g t g a g a a g c g c g t g c t t c g g t g c t t a g a g a g g c c g a g a g g a a t c t a g a c a g g c g g c c t t g c t g g g c t t c c c c a c t c g g t g t a c g a t t t c g g g a g g t c g a g g c c g g t c c c c g c t g g a t g c g a g g g 28501

KY962518\_1 g c a t t t t c a g a c t t t t c t c t c g g t c a c g t g t g g c g t c c g t a c t t c t c t a t t t c c c c g a t a a g c t c c t c g a c t t c a a c a t a a a c t g t t a a g g c c g g a c g c a a c a c g g c g a a a c c c c g t c t c t a c t a a a a a 29663  
 human\_rDNA g c a t t t t c a g a c t t t t c t c t c g g t c a c g t g t g g c g t c c g t a c t t c t c t a t t t c c c c g a t a a g c t c c t c g a c t t c a a c a t a a a c t g t t a a g g c c g g a c g c a a c a c g g c g a a a c c c c g t c t c t a c t a a a a a 28631

KY962518\_1 t a c a a a g c t g a g t c g g g a g c g g t g g g g c a g g c c c t g t a a t g c c a g c t c c t c g g g a g g c t g a g g c g g g a g a a t c g c t g a a c c a g g g a a g c g g a g g c t g c a g g g a g c c g a g a t c g c g c c a c t g c a c t a c g 29793  
 human\_rDNA t a c a a a g c t g a g t c g g g a g c g g t g g g g c a g g c c c t g t a a t g c c a g c t c c t c g g g a g g c t g a g g c g g g a g a a t c g c t g a a c c a g g g a a g c g g a g g c t g c a g g g a g c c g a g a t c g c g c c a c t g c a c t a c g 28761

KY962518\_1 g c c c a g g c t g t a g a g t g a g t g a g a c t c g g t c t c t a a a t a a a t a c g g a a t t a a t t a a t t c a t t a a t t c t t t c c c t g c t g a c g g a c a t t t g c a g g c a g g c a t c g g t t g t c t t c g g g c a t c a c c t a g c g g c 29923  
 human\_rDNA g c c c a g g c t g t a g a g t g a g t g a g a c t c g g t c t c t a a a t a a a t a c g g a a t t a a t t a a t t c a t t a a t t c t t t c c c t g c t g a c g g a c a t t t g c a g g c a g g c a t c g g t t g t c t t c g g g c a t c a c c t a g c g g c 28891

KY962518\_1 c a c t g t t a t t g a a a g t c g a c t g a c a c g g a g g g a g g t c t c g c c g a c t t c a c c g a g c c t g g g g c a a c g g g t t c t c t c t c c c t t c g g a g g c c c t c c t c t c c c t c g t t g c c t a g g g a a c c t c g c c 30053  
 human\_rDNA c a c t g t t a t t g a a a g t c g a c t g a c a c g g a g g g a g g t c t c g c c g a c t t c a c c g a g c c t g g g g c a a c g g g t t c t c t c t c c c t t c g g a g g c c c t c c t c t c c c t c g t t g c c t a g g g a a c c t c g c c 29021

KY962518\_1 t a g g g a a c c t c c g c c c t g g c g g g g c c c t a t t g t t c t t t g a t c g g c g c t t t a c t t t t c t t t g t g t t t t g g c g c c t a g a c t c t t c t a c t t g g g c t t g g g a a g g g t c a g t t t a a t t t t c a a g t t g c c c c c c 30183  
 human\_rDNA t a g g g a a c c t c c g c c c t g g c g g g g c c c t a t t g t t c t t t g a t c g g c g c t t t a c t t t t c t t t g t g t t t t g g c g c c t a g a c t c t t c t a c t t g g g c t t g g g a a g g g t c a g t t t a a t t t t c a a g t t g c c c c c c 29151

KY962518\_1 g g c t c c c c c a c t a c c c a c g t c c c t t c a c c t t a a t t t a g t g a g t c g g t t a g g t g g g t t t c c c c a a a c c g c c c c c c c c c c c c c c c c c c c c c c c c c c c c c a a c a c c c t g c t t g g a a a c c t t c c a g a g c c a c c c c g g t g t 30313  
 human\_rDNA g g c t c c c c c a c t a c c c a c g t c c c t t c a c c t t a a t t t a g t g a g t c g g t t a g g t g g g t t t c c c c a a a c c g - c c c c c c c c c c c c c c c c c c c c c c c c c c c c c c a a c a c c c t g c t t g g a a a c c t t c c a g a g c c a c c c c g g t g t 29280

KY962518\_1 g c c t c c g t c t t c t c t c c c t t c c c c a c c c c t t g c g g g c g a t c t c a t t c t t g c a g g c t g a c a t t t g c a t c g g t g g g c t a g g c c t c a c t c g g g g c c a c c g t t t t g a a g a t g g g g c g g c a c g g t c c 30443  
 human\_rDNA g c c t c c g t c t t c t c t c c c t t c c c c a c c c c t t g c g g g c g a t c t c a t t c t t g c a g g c t g a c a t t t g c a t c g g t g g g c t a g g c c t c a c t c g g g g c c a c c g t t t t g a a g a t g g g g c g g c a c g g t c c 29410

KY962518\_1 c a c t t c c c c g a g g c a g c t t g g g c g a t g g c a t a g c c c c t t g a c c c g c g t g g g c a a g c g g g c g g t c t g c a g t t g t a g g c t t t t c c c c c g c t g c t t c c c g c c t a g g c c t c c c t c c t a g g a a a g c t t 30573  
 human\_rDNA c a c t t c c c c g a g g c a g c t t g g g c g a t g g c a t a g c c c c t t g a c c c g c g t g g g c a a g c g g g c g g t c t g c a g t t g t a g g c t t t t c c c c c g c t g c t t c c g c c t a g g c c t c c c t c c t a g g a a a g c t t 29540

KY962518\_1 c a c c c t g g c t g g g t c t c g g t c a c c t t t a t c a c g a t g t t t a g t t t c c g c c c t c c g g c c a g a g a g t t c a c a a t g c g a a g g g c c a c g g c t c t a g t c t g g g c c t t c t a g t a c t t g c c c a a a a t a g 30703  
 human\_rDNA c a c c c t g g c t g g g t c t c g g t c a c c t t t t a t c a c g a t g t t t a g t t t c c g c c c t c c g g c c a g a g a g t t c a c a a t g c g a a g g g c c a c g g c t c t a g t c t g g g c c t t c t a g t a c t t g c c c a a a a t a g 29670

KY962518\_1 a a a c g c t t t c t g a a a c t a a t a a c t t t g c t c a c t t a a g a t t t c c a g g g a c g g c g c c t t g g c c c g t g t t t g t g g c t g t t t t g t t c g t t c t g t t t t g t t t g t t c g t g t t t t c c t t t c t c g t a t g t c t 30833  
 human\_rDNA a a a c g c t t t c t g a a a c t a a t a a c t t t g c t c a c t t a a g a t t t c c a g g g a c g g c g c c t t g g c c c g t g t t t g t g g c t g t t t t g t t t c g t t c t g t t t t g t t t g t t c g t g t t t t c c t t t c t c g t a t g t c t 29800

KY962518\_1 t t c t t t t c a g g t g a a g t a g a a t c c c c a g t t t t c a g g a a g a c g t c t a t t t t c c c a a g a c a c g t t a g c t g c c g t t t t t c c t g t t g t g a a c t a g c g c t t t t g t a c t c t c t c a a c g t g c a g t g a g a g c g g 30963  
 human\_rDNA t t c t t t t c a g g t g a a g t a g a a t c c c c a g t t t t c a g g a a g a c g t c t a t t t t c c c a a g a c a c g t t a g c t g c c g t t t t t c c t g t t g t g a a c t a g c g c t t t t g t a c t c t c t c a a c g t g c a g t g a g a g c g g 29930

KY962518\_1 g t t g a t g t t t a c t a t c c t t c a t c a t g a c a t c t t a t t t t c t a g a a a t c c g t a g g c g a a t g c t g c t g c t g c t t g t t g c t g t t g t t g t t g t t g t t g t t g t t g t t g t t g t t g t t g t t g t t g t t g t t 31093  
 human\_rDNA g t t g a t g t t t a c t a t c c t t c a t c a t g a c a t c t t a t t t t c t a g a a a t c c g t a g g c g a a t g c t g c t g c t g c t t g t t g c t g t t g t t g t t g t t g t t g t t g t t g t t g t t g t t g t t g t t g t t g t t g t t g t t 30060





KY962518\_1 agcccggccttcgctcggctaaaagtcctaaagggaatggctgacttccaccacaaaggtcccactgaacggcgaagatgtggagcgttaggtcagagaggggaccaggaggggagacgtcccgcagggcgacga 33281  
 human\_rDNA agcccggccttcgctcggctaaaagtcctaaagggaatggctgacttccaccacaaaggtcccactgaacggcgaagatgtggagcgttaggtcagagaggggaccaggaggggagacgtcccgcagggcgacga 33269

KY962518\_1 gttcccaaggctctggccaccccccacgccccacgccccacgctccggggcaccggcgggacacggcggctttatcccctcctctgtccacagcggccccaccaccacgcaaccacgcacacacg 33411  
 human\_rDNA gttcccaaggctctggccaccccccacgccccacgccccacgctccggggcaccggcgggacacggcggctttatcccctcctctgtccacagcggccccaccaccacgcaaccacgcacacacg 33399

KY962518\_1 ctggagggttccaaaaccacacgggtgtgactagagcctgacggagcggagagcgcatttccagaggtgggaggggtgggggtgggttgggggttgggggtctgtggcgagcccgatttccctctt 33541  
 human\_rDNA ctggagggttccaaaaccacacgggtgtgactagagcctgacggagcggagagcgcatttccagaggtgggaggggtgggggtgggttgggggttgggggtctgtggcgagcccgatttccctctt 33529

KY962518\_1 gggtagctacaggctagaaaagaatgccttctggggcggaggggcttcccttagggccatcacggcttgcgggactaccttcaaacctccccttgaggccacaaaatagattccaccccaccatcgac 33671  
 human\_rDNA gggtagctacaggctagaaaagaatgccttctggggcggaggggcttcccttagggccatcacggcttgcgggactaccttcaaacctccccttgaggccacaaaatagattccaccccaccatcgac 33659

KY962518\_1 gtttccccgggtgctggatgtatcctgtcaagagacctgagcctgacaccgtcgaaataaacaccttgactggcttgggtgtttgtttgttcttgagatggagcttctgctgttccccaggctggag 33801  
 human\_rDNA gtttccccgggtgctggatgtatcctgtcaagagacctgagcctgacaccgtcgaaataaacaccttgactggcttgggtgtttgtttgttcttgagatggagcttctgctgttccccaggctggag 33789

KY962518\_1 tgcagtgggcgtgatctcagctcactggaacctctgcctcctgggttcaagtgaattctcctgtctcagcggccacctaggccggctcatttttttttttttttttttttttttttttttttttttt 33931  
 human\_rDNA tgcagtgggcgtgatctcagctcactggaacctctgcctcctgggttcaagtgaattctcctgtctcagcggccacctaggccggctcatttttttttttttttttttttttttttttttttttttt 33893

KY962518\_1 ttgtagacacggggttccacctcttcatctgggttttctactggagattctagattcagcaccacctcattccgtgccacagagagacttcttttttttttttttttaagcgcaacgcaacatgtc 34060  
 human\_rDNA ttgtagacacggggttccacctcttcatctgggttttctactggagattctagattcagcaccacctcattccgtgccacagagagacttcttttttttttttttttaagcgcaacgcaacatgtc 33023

KY962518\_1 tgccttatttgagtggtctcctatatcatataaattgtgtttagatgaagaaacggattaaacacctgtgctaaatgatagtgaaagtgaagacaaaagaaaggctatctattttgtggttagaataaag 34190  
 human\_rDNA tgccttatttgagtggtctcctatatcatataaattgtgtttagatgaagaaacggattaaacacctgtgctaaatgatagtgaaagtgaagacaaaagaaaggctatctattttgtggttagaataaag 33153

KY962518\_1 ttgctcagtattttagagctacctaaaatcgtcagcatttacactcttcttagtaaaagctggccaatctgaataatcctcctttaaacaacaacacattttgtagaggttaagattttttaagaatgcg 34320  
 human\_rDNA ttgctcagtattttagagctacctaaaatcgtcagcatttacactcttcttagtaaaagctggccaatctgaataatcctcctttaaacaacaacacattttgtagaggttaagattttttaagaatgcg 33283

KY962518\_1 actcctgcaaaaatagctgaacagacgatcacatttaaaaaataacaacacaaggatcaaccagacttgggaaaaaatcgaaaaccacacaagctttagaagaactgagttcttaaaataggacggag 34450  
 human\_rDNA actcctgcaaaaatagctgaacagacgatcacatttaaaaaataacaacacaaggatcaaccagacttgggaaaaaatcgaaaaccacacaagctttagaagaactgagttcttaaaataggacggag 33413

KY962518\_1 aacgtagctatcggaaagagaaggcagatattggcaagttgatgttacgttggtcagcagtagctggcactatcttttggccatcttctggggcaatgtaactactacagcaaaaatagagatgatccatt 34580  
 human\_rDNA aacgtagctatcggaaagagaaggcagatattggcaagttgatgttacgttggtcagcagtagctggcactatcttttggccatcttctggggcaatgtaactactacagcaaaaatagagatgatccatt 33543

KY962518\_1 aaacaacatattcgcaaatcaaaaagtgtttcagtaataataatgcttcagatttagaagcaaatcaaatgtagaactccactgctgtaataagtaccaccaagatcaccgtatctgacaaaaataacta 34710  
 human\_rDNA aaacaacatattcgcaaatcaaaaagtgtttcagtaataataatgcttcagatttagaagcaaatcaaatgtagaactccactgctgtaataagtaccaccaagatcaccgtatctgacaaaaataacta 33673

KY962518\_1 ccacagggttatgacttcagaatcatacttctcttgataatttacttattgtatgtatttttttttaatttctcttgagacggcgctcgctctgtcgccaggctggagtgcgatgggtgtgata 34840  
 human\_rDNA ccacagggttatgacttcagaatcatacttctcttgataatttacttattgtatgtatttttttttaatttctcttgagacggcgctcgctctgtcgccaggctggagtgcgatgggtgtgata 33803

KY962518\_1 ctcggtcactgcaaccggccacctcccctgggttcaagcgaattctcctgcctcagcctcccagtagctgggactacaggtgcccggcaccacgcccagctaatctttatacttttaatagagacggggtt 34970  
 human\_rDNA ctcggtcactgcaaccggccacctcccctgggttcaagcgaattctcctgcctcagcctcccagtagctgggactacaggtgcccggcaccacgcccagctaatctttatacttttaatagagacggggtt 33933

KY962518\_1 tcaccgtgtcggccggatggctcgcgtcttggacctgtgaccgcccggcctcggcctcccaggctcgggatgacaggcgtgagccactgagccggccttctcttgacgtttaaactatgaagtc 35100  
 human\_rDNA tcaccgtgtcggccggatggctcgcgtcttggacctgtgaccgcccggcctcggcctcccaggctcgggatgacaggcgtgagccactgagccggccttctcttgacgtttaaactatgaagtc 34063

KY962518\_1 agtccagagaaaacgcaataaagtcaacggtaggtaggtgttggagcagaagtaggaccacacttttccctatcttattcagttgataaacaatagaccaggtagtaatttccctatgtgcctactt 35230  
 human\_rDNA agtccagagaaaacgcaataaagtcaacggtaggtaggtgttggagcagaagtaggaccacacttttccctatcttattcagttgataaacaatagaccaggtagtaatttccctatgtgcctactt 34193

KY962518\_1 acacgagtacaaaagagtaaaacagagagactgctaaattaaagggtagcgaagtcttctcagtagtaactccgtaaacctggaaacactgtcaaaaagcagcagctagtgaaattgtttccatgtattttct 35360  
 human\_rDNA acacgagtacaaaagagtaaaacagagagactgctaaattaaagggtagcgaagtcttctcagtagtaactccgtaaacctggaaacactgtcaaaaagcagcagctagtgaaattgtttccatgtattttct 34323

KY962518\_1 attatccaaataagtgaaactatgctatttcccttccagctctcccaagcacttcttgtccccaaccaccctcgggtgctcgaagaaaaagtaacaaatacaaggaaacacacacacacaaacc 35490  
 human\_rDNA attatccaaataagtgaaactatgctatttcccttccagctctcccaagcacttcttgtccccaaccaccctcgggtgctcgaagaaaaagtaacaaatacaaggaaacacacacacacaaacc 34453

KY962518\_1 aaagacaactacagcgtctgcaaaaagtttgcctagaagactgaaactgttgagtataaggaactcgggtatctacgatcatgagttcacttcagagttgttcaagacatacgtttcgttaaggaaacatctt 35620  
 human\_rDNA aaagacaactacagcgtctgcaaaaagtttgcctagaagactgaaactgttgagtataaggaactcgggtatctacgatcatgagttcacttcagagttgttcaagacatacgtttcgttaaggaaacatctt 34583

KY962518\_1 agttagaagttattcagcagtaggtaccaaccctaagttattttaccacaaattcgtgacaaataagagctatctaacagaaaaattagcagtagccggcaccatccatagggcctttgtctttacgcttc 35750  
 human\_rDNA agttagaagttattcagcagtaggtaccaaccctaagttattttaccacaaattcgtgacaaataagagctatctaacagaaaaattagcagtagccggcaccatccatagggcctttgtctttacgcttc 34713

KY962518\_1 attagcacttaccatgcttacaatgcttaggattgacctgtagcatttcgaaaaacagctaatgctttgtccagttctcagtgaaagacaagctcaccgacctaatgctctatagggcataaagcatcat 35880  
 human\_rDNA attagcacttaccatgcttacaatgcttaggattgacctgtagcatttcgaaaaacagctaatgctttgtccagttctcagtgaaagacaagctcaccgacctaatgctctatagggcataaagcatcat 34843

KY962518\_1 ttggatccacttcgagagttctctggaagaattgaaatcgcaataatcgtgttcccggttcgagaccgaaacagttccctgcagcacaccaggccctcggctggcgaattttatccatgctctgtgaagtctt 36010  
 human\_rDNA ttggatccacttcgagagttctctggaagaattgaaatcgcaataatcgtgttcccggttcgagaccgaaacagttccctgcagcacaccaggccctcggctggcgaattttatccatgctctgtgaagtctt 34973

KY962518\_1 tggacagaactgaaagagcaaccctcttccggaggatgccaaagtgtttagagtagatctccatgacctcagactctgtaattctcaatcctcctaacctctgagaaattgtctttcagcttgcgtggactc 36140  
 human\_rDNA tggacagaactgaaagagcaaccctcttccggaggatgccaaagtgtttagagtagatctccatgacctcagactctgtaattctcaatcctcctaacctctgagaaattgtctttcagcttgcgtggactc 35103

KY962518\_1 tgaagtttacaatagggccttccgatttggcacagtacccaaccggatttgcagtggtgagaagctagatggctcaagatgctgtagcttcttggcgtggtaagaacacaaagctaaataacccttct 36270  
 human\_rDNA tgaagtttacaatagggccttccgatttggcacagtacccaaccggatttgcagtggtgagaagctagatggctcaagatgctgtagcttcttggcgtggtaagaacacaaagctaaataacccttct 35233

KY962518\_1 cccctttcagcaagaaggctcactcaagccttccgctgctgctttttgtagattaaaagcctgaaatctgaggcgcgatttggctattttccctctgaaatgacggaagagtccaatttgtcacttcca 36400  
 human\_rDNA cccctttcagcaagaaggctcactcaagccttccgctgctgctttttgtagattaaaagcctgaaatctgaggcgcgatttggctattttccctctgaaatgacggaagagtccaatttgtcacttcca 35363

KY962518\_1 ggctatcacttattgttcgggtggagttattgctcctttattagttttacttttggttcttctgtttgggatttttaggtggaaacttcatttttaaatttctcctattctcctcgggttgtggagctgtcact 36530  
 human\_rDNA ggctatcacttattgttcgggtggagttattgctcctttattagttttacttttggttcttctgtttgggatttttaggtggaaacttcatttttaaatttctcctattctcctcgggttgtggagctgtcact 35493

KY962518\_1 agtcaagagtcgtgaaatttcttcgaggcgggtgcatttgggggagatgccatagtggggctcaaatacctgagggttggccttctcggcggaccagaactttgtgtttttgcaaggactggagttaccttt 36660  
 human\_rDNA agtcaagagtcgtgaaatttcttcgaggcgggtgcatttgggggagatgccatagtggggctcaaatacctgagggttggccttctcggcggaccagaactttgtgtttttgcaaggactggagttaccttt 35623

KY962518\_1 cggctctttccctctcgcgagaagacagacgggttccgggttggcggatttctggcaacaggcctttttgaaagggctcgggtggatggcacgtcaatgacagacgggtgtctcattaccagtcagttttg 36790  
 human\_rDNA cggctctttccctctcgcgagaagacagacgggttccgggttggcggatttctggcaacaggcctttttgaaagggctcgggtggatggcacgtcaatgacagacgggtgtctcattaccagtcagttttg 35753

KY962518\_1 tcaatagggctcgtctcgggacttggggttcttaatggcaaaaatgccaacacttggggttaaaggactaacagctgctggtctccttaataaaactcgaccagttttgggttattgttgaacctgtttta 36920  
 human\_rDNA tcaatagggctcgtctcgggacttggggttcttaatggcaaaaatgccaacacttggggttaaaggactaacagctgctggtctccttaataaaactcgaccagttttgggttattgttgaacctgtttta 35883

KY962518\_1 gatcatatggaagttcctgtttccagtgggacagatcaggtgaaaggacagctgaaatcgatagaagacactggggagctctgtattcaaggagtaactttgaaatggaagattctaaatccatccggtttc 37050  
 human\_rDNA gatcatatggaagttcctgtttccagtgggacagatcaggtgaaaggacagctgaaatcgatagaagacactggggagctctgtattcaaggagtaactttgaaatggaagattctaaatccatccggtttc 36013

KY962518\_1 attcgacgggtctcctggggtgtttccgtaagaacgggtctcgggctgtctgtgacataaacctaggacagaggtccaaggttgggtggcgaacacttggacagggcagttgctaaagctctctagagaggtgaa 37180  
 human\_rDNA attcgacgggtctcctggggtgtttccgtaagaacgggtctcgggctgtctgtgacataaacctaggacagaggtccaaggttgggtggcgaacacttggacagggcagttgctaaagctctctagagaggtgaa 36143

KY962518\_1 tcaaaaatgtttggctcaggatctggcctttccccctatttcacatcagattcaaaagggacaccagaggaaggatttcaacgaaggctcttttggtcacattctgatcctttggtaagccgatctgtct 37310  
 human\_rDNA tcaaaaatgtttggctcaggatctggcctttccccctatttcacatcagattcaaaagggacaccagaggaaggatttcaacgaaggctcttttggtcacattctgatcctttggtaagccgatctgtct 36273

KY962518\_1 | 37,460 | 37,480 | 37,500 | 37,520 | 37,540 | 37,560 | 37440  
 human\_rDNA | tgcaatatacatgtcccgacgatggaaggaggaaagcgagctgaaatcaccaaactcaggaacgataataatcactcgtggcctttctgctttatgaaacactccaccgcgataagatttgatccccctctgcaag | 36403  
 | 37,580 | 37,600 | 37,620 | 37,640 | 37,660 | 37,680 | 37,700 |  
 KY962518\_1 | cttgctgagatcaacacaacatttcgcaagcaggcattttgcatcggggtagtacaaactgtgtcctttcaagagctataatgttttataggcctttccctgagcggtaagaacaggctgcagtaagaac | 37570  
 human\_rDNA | cttgctgagatcaacacaacatttcgcaagcaggcattttgcatcggggtagtacaaactgtgtcctttcaagagctataatgttttataggcctttccctgagcggtaagaacaggctgcagtaagaac | 36533  
 | 37,720 | 37,740 | 37,760 | 37,780 | 37,800 | 37,820 |  
 KY962518\_1 | aaggcttcttctgagtgacttctgcaataaaggcgtttcgcgggggaaaccgcatctcggtaggcataagtttagtgccttgccaatagcagcctggacgggtccctgcagcaccgccatctcagagg | 37700  
 human\_rDNA | aaggcttcttctgagtgacttctgcaataaaggcgtttcgcgggggaaaccgcatctcggtaggcataagtttagtgccttgccaatagcagcctggacgggtccctgcagcaccgccatctcagagg | 36663  
 | 37,840 | 37,860 | 37,880 | 37,900 | 37,920 | 37,940 | 37,960 |  
 KY962518\_1 | ctacggcccactttctgcagtgccacaggcaccccccccccccatagcggctccggcggcggcggcctcggctcatttaaaggcaccagccggcgttacgggggtaggggggagtcggagacagaaatg | 37830  
 human\_rDNA | ctacggcccactttctgcagtgccacaggcaccccccccccccatagcggctccggcggcggcggcctcggctcatttaaaggcaccagccggcgttacgggggtaggggggagtcggagacagaaatg | 36792  
 | 37,980 | 38,000 | 38,020 | 38,040 | 38,060 | 38,080 |  
 KY962518\_1 | acttcttatactgctgactctgaaaagccggcgcccttctgatccattgcaaacggaggtcacctcgtgtttagaacacggatccactcccaagttcagtggggggtagtgagggggtggcaggtag | 37960  
 human\_rDNA | acttcttatactgctgactctgaaaagccggcgcccttctgatccattgcaaacggaggtcacctcgtgtttagaacacggatccactcccaagttcagtggggggtagtgagggggtggcaggtag | 36922  
 | 38,100 | 38,120 | 38,140 | 38,160 | 38,180 | 38,200 | 38,220 |  
 KY962518\_1 | gacgaaggactctcttcttctgattcggctctgacagtggggacctagggtcggagctctctccgtcgggaccgctgactccctctaccttgggttccctcggccccaccctggaacgcccggccttggc | 38090  
 human\_rDNA | gacgaaggactctcttcttctgattcggctctgacagtggggacctagggtcggagctctctccgtcgggaccgctgactccctctaccttgggttccctcggccccaccctggaacgcccggccttggc | 37052  
 | 38,240 | 38,260 | 38,280 | 38,300 | 38,320 | 38,340 |  
 KY962518\_1 | agattctggcccttcttggccctcagtcgctgtcagaaaaccccatctcactgctcggatgcccggagtgactgtggctcggcaccctctcgggaaacattggaaaatctctctctacgcggccacctgaa | 38220  
 human\_rDNA | agattctggcccttcttggccctcagtcgctgtcagaaaaccccatctcactgctcggatgcccggagtgactgtggctcggcaccctctcgggaaacattggaaaatctctctctacgcggccacctgaa | 37182  
 | 38,360 | 38,380 | 38,400 | 38,420 | 38,440 | 38,460 | 38,480 |  
 KY962518\_1 | accacaggagctcgggacacacgctgcttctgggagagaaatgctgagagctcttgcggactctctcttgacttgagtctctcgtgggtgctggtttagacgtagtgagaccagatgtatctaactcaggc | 38350  
 human\_rDNA | accacaggagctcgggacacacgctgcttctgggagagaaatgctgagagctcttgcggactctctcttgacttgagtctctcgtgggtgctggtttagacgtagtgagaccagatgtatctaactcaggc | 37312  
 | 38,500 | 38,520 | 38,540 | 38,560 | 38,580 | 38,600 |  
 KY962518\_1 | cgggtgctggtggctcagcctgtaaccccaacactttgggaggccgaggccgtaggatccctcgaggaaatcgcttaaccctggggagggttagggttcagtgagtgagccatagttgtgtcactgtgct | 38480  
 human\_rDNA | cgggtgctggtggctcagcctgtaaccccaacactttgggaggccgaggccgtaggatccctcgaggaaatcgcttaaccctggggagggttagggttcagtgagtgagccatagttgtgtcactgtgct | 37442  
 | 38,620 | 38,640 | 38,660 | 38,680 | 38,700 | 38,720 | 38,740 |  
 KY962518\_1 | ccagctcgggcgaaagacagaaatgaggccctgcca --- caggcaggcaggcaggcaggcaggcagaaagacaacagctgtattatgttcttctcagggtaggaaagcaaaaaataacagaaatcagcactt | 38606  
 human\_rDNA | ccagctcgggcgaaagacagaaatgaggccctgcca caggcaggcaggcaggcaggcaggcagaaagacaacagctgtattatgttcttctcagggtaggaaagcaaaaaataacagaaatcagcactt | 37572  
 | 38,760 | 38,780 | 38,800 | 38,820 | 38,840 | 38,860 |  
 KY962518\_1 | aattaaatTTTTTTTTTtcccttcggacggagtttcaactcttgggtgccacgctggagtgagtgaccacatctcggctcaccgcaacctccacctcccgggttaagcgaattctcttgcctcagcctcc | 38736  
 human\_rDNA | aattaa - TTTTTTTTTTtcccttcggacggagtttcaactcttgggtgccacgctggagtgagtgaccacatctcggctcaccgcaacctccacctcccgggttaagcgaattctcttgcctcagcctcc | 37701  
 | 38,880 | 38,900 | 38,920 | 38,940 | 38,960 | 38,980 | 39,000 |  
 KY962518\_1 | tgagtagctgggattacagggaggagccaccacaccagctgattttgtattgttagtagagacggcatttctccatgtgggtcaggctggctcgaactggcgacccccagtggaatcggccgccccggc | 38866  
 human\_rDNA | tgagtagctgggattacagggaggagccaccacaccagctgattttgtattgttagtagagacggcatttctccatgtgggtcaggctggctcgaactggcgacccccagtggaatcggccgccccggc | 37831  
 | 39,020 | 39,040 | 39,060 | 39,080 | 39,100 | 39,120 |  
 KY962518\_1 | ctcccaaagtgctggggtgacagggcgtgagccaatcgtgactggccggctacgtttatTTTTTTTTTtaattatttttactTTTTTTTtagttttccatTTTaaatctattttattttacattttt | 38996  
 human\_rDNA | ctcccaaagtgctggggtgacagggcgtgagccaatcgtgactggccggctacgtttatTTTTTTTTTtaattatttttactTTTTTTTtagttttccatTTTaaatctattttattttacattttt | 37961  
 | 39,140 | 39,160 | 39,180 | 39,200 | 39,220 | 39,240 | 39,260 |  
 KY962518\_1 | atttattttattttactttattttattttttcggagacagactctcgtctcgtgcccaggcgtggagtcagcggcgtgactcggctcactgcaagctccgcctcccgggttcacgccattctcctgc | 39126  
 human\_rDNA | atttattttattttactttattttattttttcggagacagactctcgtctcgtgcccaggcgtggagtcagcggcgtgactcggctcactgcaagctccgcctcccgggttcacgccattctcctgc | 38091  
 | 39,280 | 39,300 | 39,320 | 39,340 | 39,360 | 39,380 |  
 KY962518\_1 | ctacgctcccaagtagctgggactacagggcggccggccaccgtgcccggctaaactttttgtattttgagtagagatgggtttcactgtggttagccaggatggctcgaatcctgacccccgtgacccgt | 39256  
 human\_rDNA | ctacgctcccaagtagctgggactacagggcggccggccaccgtgcccggctaaactttttgtattttgagtagagatgggtttcactgtggttagccaggatggctcgaatcctgacccccgtgacccgt | 38221  
 | 39,400 | 39,420 | 39,440 | 39,460 | 39,480 | 39,500 | 39,520 |  
 KY962518\_1 | ccacctcggccctcccaaagtgctgggtagacagggcgtgagccaccgccccggcctattatctattttaaactttgagtcagggttagaaaccagttagttttttaa - TTTTTTTTTTTTTTTT | 39386  
 human\_rDNA | ccacctcggccctcccaaagtgctgggtagacagggcgtgagccaccgccccggcctattatctattttaaactttgagtcagggttagaaaccagttagttttttaa - TTTTTTTTTTTTTTTT | 38350

KY962518\_1 t t t t t g a g a c g a g g t t t c a c c g t g t t g c c a a g g c t t g g a c c g a g g g a t c c a c c g g c c t c g g c t c c c a a a a g t g c g g g a t g a c a g g c g c g a g c t a c c g c g c c c g g a c c c c c c t t t c c c t t c c c c 39516  
 human\_rDNA t t t t t g a g a c g a g g t t t c a c c g t g t t g c c a a g g c t t g g a c c g a g g g a t c c a c c g g c c t c g g c t c c c a a a a g t g c g g g a t g a c a g g c g c g a g c t a c c g c g c c c g g a c c c c c c t t t c c c t t c c c c 38480

KY962518\_1 c g c t g t c t t c c c g a c a g a c a g t t t c a c g g c a g a g c g t t t g g c t g g c g t g c t t a a a c t c a t t c t a a a t a g a a a t t g g g a c g t c a g c t t c t g g c c t a c a g g a c t c t g a g c c g a g g a g t c c c c t g g t c t g t 39646  
 human\_rDNA c g c t g t c t t c c c g a c a g a c a g t t t c a c g g c a g a g c g t t t g g c t g g c g t g c t t a a a c t c a t t c t a a a t a g a a a t t g g g a c g t c a g c t t c t g g c c t a c a g g a c t c t g a g c c g a g g a g t c c c c t g g t c t g t 38610

KY962518\_1 c t a t c a c a g g a c c g t a c a c g t a a g g a g a g a a a a t c g t a a c g t t c a a a g t c a g t c a t t t t g t a t a c a g a a a t a c a c g g a t t c a c c c a a a a c a c a g a a a g c a g t c t t t a g a a a t g g c c t t a g c c c t g g 39776  
 human\_rDNA c t a t c a c a g g a c c g t a c a c g t a a g g a g a g a a a a t c g t a a c g t t c a a a g t c a g t c a t t t t g t a t a c a g a a a t a c a c g g a t t c a c c c a a a a c a c a g a a a g c a g t c t t t a g a a a t g g c c t t a g c c c t g g 38740

KY962518\_1 t g t c c g t g c c a g t g a t t c t t t t c g g t t t g g a c c t g a c t g a g a g g a t t c c c a g t c g g t c t c t c g t c t c t g g a c g g a a g t t c c a g a t g a t c c g a t g g g t g g g g a c t t a g g c t g c g t c c c c c a g g a g c c c 39906  
 human\_rDNA t g t c c g t g c c a g t g a t t c t t t t c g g t t t g g a c c t g a c t g a g a g g a t t c c c a g t c g g t c t c t c g t c t c t g g a c g g a a g t t c c a g a t g a t c c g a t g g g t g g g g a c t t a g g c t g c g t c c c c c a g g a g c c c 38870

KY962518\_1 t g g t c g a t t a g t t g t g g g a t c g c c t t g g a g g g c g g g t g a c c c a c t g t g c t g t g g g a g c c t c c a t c c t t c c c c c a c c c c t c c c c a g g g a t c c c a a t t c a t t c c g g g c t g a c a c g t c a c t g g c a g g 40036  
 human\_rDNA t g g t c g a t t a g t t g t g g g a t c g c c t t g g a g g g c g g g t g a c c c a c t g t g c t g t g g g a g c c t c c a t c c t t c c c c c a c c c c t c c c c a g g g a t c c c a a t t c a t t c c g g g c t g a c a c g t c a c t g g c a g g 39000

KY962518\_1 c g t c g g g c a t c a c c t a g c g g t c a c t g t t a c t c t g a a a a c g g a g g c t c a c a g a g g a a g g g a g c a c c a g g c c g c t g c g c a c a g c c t g g g g c a a c t g t g t c t t c t c a c c g c c c c g c c c c a c c t c c a a g 40166  
 human\_rDNA c g t c g g g c a t c a c c t a g c g g t c a c t g t t a c t c t g a a a a c g g a g g c t c a c a g a g g a a g g g a g c a c c a g g c c g c t g c g c a c a g c c t g g g g c a a c t g t g t c t t c c a c c g c c c c g c c c c a c c t c c a a g 39130

KY962518\_1 t t c t c c c t c c c t t g t t g c c t a g g a a a t c g c c a c t t t g a c g a c c g g g t c t g a t g a c c t t t g a t c a g g c a a a a a c g a a a a c a g a t a a a t a a a t a a a t a a c a c a a a a g t a a c t a a c t a a a t a a a t a a 40296  
 human\_rDNA t t c t c c c t c c c t t g t t g c c t a g g a a a t c g c c a c t t t g a c g a c t g g g t c t g a t t g a c c t t t g a t c a g g c a a a a a c g a a a a c a g a t a a a t a a a a t a a c a c a a a a g t a a c t a a c t a a a t a a a t a a 39260

KY962518\_1 g t c a a t a c a a c c c a t t a c a a t a c a a t a a g a t a c g a t a c g a t a g g a t g c g a t a g g a t a c g a t a g g a t a c a a t a c a a t a c g a t a c g ----- a t a c a a 40386  
 human\_rDNA g t c a a t a c a a c c c a t t a c a a t a c a a t a a g a t a c g a t a c g a t a g g a t g c g a t a g g a t a c g a t a g g a t a c a a t a c a a t a c g a t a c g a t a c a a t a c a a t a c g a t a c a a t a c a a t a c a a t a c a a t a c a a t a c a a 39390

KY962518\_1 t a c a a t a c a a t a c a a t a c a a t a c a a t a c a a t a c a a t a c a a t a c a a t a c g c c g g g c g c g g t g g c t c a t g c c t g t c a t c c c g t c a c t t t g g g a t g c c g a g g t g g a c g c a t c a c c t g a a g t c g g g a g t t g g a g 40516  
 human\_rDNA t a c a a t a c a a t a c a a t a c a a t a c a a t a c a a t a c a a t a c a a t a c a a t a c a a t a c g c c g g g c g c g g t g g c t c a t g c c t g t c a t c c c g t c a c t t t g g g a t g c c g a g g t g g a c g c a t c a c c t g a a g t c g g g a g t t g g a g 39520

KY962518\_1 a c a a g c c c g a c c a a c a t g g a g a a a t c c c g t c t c a a t t g a a a a t a c a a a a c t a g c c g g g c g c g g t g g c a c a t g c c t a t a a t c c c a g c t g c t a g g a a g g c t g a g g c a g g a a a t c g c t t g a a c c t g g g a a g c 40646  
 human\_rDNA a c a a g c c c g a c c a a c a t g g a g a a a t c c c g t c t c a a t t g a a a a t a c a a a a c t a g c c g g g c g c g g t g g c a c a t g c c t a t a a t c c c a g c t g c t a g g a a g g c t g a g g c a g g a a a t c g c t t g a a c c t g g g a a g c 39650

KY962518\_1 g g a g g t t g c a g t g a g c c g a g a t t g c g c c a t c g c a c t c c a g t c t g a g c a a c a a g a g c g a a a c t c c g t c t c a a a a a t a a a t a c a t a a a t a a a t a c a t a c a t a c a t a c a t a c a t a c a t a a a t t a a 40776  
 human\_rDNA g g a g g t t g c a g t g a g c c g a g a t t g c g c c a t c g c a c t c c a g t c t g a g c a a c a a g a g c g a a a c t c c g t c t c a a a a a t a a a t a c a t a a a t a a ----- a t a c a t a c a t a c a t a c a t a c a t a c a t a c a t a a a t t a a 39776

KY962518\_1 a a t a a a t a a a t a a a a t a a a a t a a a t a a a t g g g c c t g c g c g g t g g c t c a a g c c t g t c a t c c c c t c a c t t t g g g a g c c a a g g c c g g t g g a t c a a g a g c g g t c a g a c c a a c a g g g c c a g t a t g g t g a a a c 40906  
 human\_rDNA a a t a a a t a a a t a a a a t a a a a t a a a t a a a t g g g c c t g c g c g g t g g c t c a a g c c t g t c a t c c c c t c a c t t t g g g a g c c a a g g c c g g t g g a t c a a g a g c g g t c a g a c c a a c a g g g c c a g t a t g g t g a a a c 39906

KY962518\_1 c c c g t c t c t a c t c a c a a t a c a c a a c a t t a g c c g g g c g c t g t g c t g t a c t g t c t g t a a t c c c a g c t a c t c g g g a g g c c g a g c t g a g g c a g g a a t c g c t t g a a c c t g g g a g c g g a g g t g c a g t 41036  
 human\_rDNA c c c g t c t c t a c t c a c a a t a c a c a a c a t t a g c c g g g c g c t g t g c t g t a c t g t c t g t a a t c c c a g c t a c t c g g g a g g c c g a g c t g a g g c a g g a a t c g c t t g a a c c t g g g a g c g g a g g t t g c a g t 40036

KY962518\_1 g a g c c g a g a t c g c g c c a c t g c a a c c c a g c c t g g g c g a c a g a g c g a g a c t c c g t c t c c a a a a a a t g a a a t g a a a a t g a a a c g c a a c a a a a t a a t t a a a a a g t g a g t t t c t g g g g a a a a g a g a a a a g a a 41166  
 human\_rDNA g a g c c g a g a t c g c g c c a c t g c a a c c c a g c c t g g g c g a c a g a g c g a g a c t c c g t c t c c a a a a a a t g a a a t g a a a a t g a a a c g c a a c a a a a t a a t t a a a a a g t g a g t t t c t g g g g a a a a g a g a a a a g a a 40166

KY962518\_1 a a a a g a a a a a a a c a a c a a a c a g a a a c c c c a c c g t g a c a t a c a c g t a c g c c t c t c g c c t t t c g a g g c c t c a a a c a c g t t a g g a a t t a t g c g t g a t t c t t t t t t a a c t t c a t t t t a t g t t a t t a t c a 41296  
 human\_rDNA a a a a g a a a a a a a c a a c a a a c a g a a a c c c c a c c g t g a c a t a c a c g t a c g c c t c t c g c c t t t c g a g g c c t c a a a c a c g t t a g g a a t t a t g c g t g a t t c t t t t t t a a c t t c a t t t t a t g t t a t t a t c g 40296

KY962518\_1 t g a t t g a t g t t t c g a g a c g g a g t c t c g g a g g c c c g c c t c c c t g g t t g c c c a g a c a a c c c c g g g a g a c a g a c c c t g g c t g g g c c c g a t g t t t c t c t c c t t g g t a g g g g t t t c c t t g t c t t t c t t c g t g 41426  
 human\_rDNA t g a t t g a t g t t t c g a g a c g g a g t c t c g g a g g c c c g c c t c c c t g g t t g c c c a g a c a a c c c c g g g a g a c a g a c c c t g g c t g g g c c c g a t g t t t c t c t c c t t g g t a g g g g t t t c c t t g t c t t t c t t c g t g 40426



KY962518\_1 t c t t t c c t c a t t c t t t c t c t t t t t c g t g t t t c t t t c c c t t c c c g t c t g t c t t t t a a a a a t g g a g t g t t c a g a a g t t t a c t t t g t g t a t c t a c g t t t t c t a a a t g t c t c t t t t c t c c a t t g t c t t 43517  
 human\_rDNA t c t t t c c t c a t t c t t t c t c t t t t t c g t g t t t c t t t c c c g t c t g t c t t t t a a a a a t g g a g t g t t c a g a a g t t t a c t t t g t g t a t c t a c g t t t t c t a a a t g t c t c t t t t c t c c a t t t t c t t 42632

KY962518\_1 c c t c c c t c c c t c c c t c c c t c c c t c c c t g c t c c c t c c c t c c c t t t c g c c a t c t g t c t c t t t c c c c a c t c c c c t c c c c c c g t c t g t c t c t g c g t g g a t t c c g g a a g a g c c t a c g c a t t c t g c 43647  
 human\_rDNA c c t c c c t c c c t c c c t c c c t c c c t c c c t g c t c c c t c c c t c c c t t t c g c c a t c t g t c t c t t t c c c c a c t c c c c t c c c c c c g t c t g t c t c t g c g t g g a t t c c g g a a g a g c c t a c g c a t t c t g c 42762

KY962518\_1 c t c t c c g t g t g t c t g c a g c g a c c c g c g a c c g a g t c c t t g t g t g t t t t c t c c c t c c c t c c c t c c c t c c c t c c c t c c c t g c t c c g a g a g g c a t c t c c a a a c a c c c a c g c g c c g t g g g t t g t c t t c 43777  
 human\_rDNA c t c t c c g t g t g t c t g c a g c g a c c c g c g a c c g a g t c c t t g t g t g t t t t c t c c c t c c c t c a c t c c c t c c c t c c c t c c c t c c c t g c t c c g a g a g g c a t c t c c a a a c a c c c a c g c g c c g t g g g t t g t c t t c 42892

KY962518\_1 t g a c t c t g t c g c g g t c g a g g c a g a g a c g c g t t t t g g g c a c c g t t t g t g t g g g g t g g g g c a g a g g g c t g c g t t t c g g c c t c g g g a a g a g c t t c t c g a c t c a c g g t t t c g c t t t c g c g g t c c a c g g g c c 43907  
 human\_rDNA t g a c t c t g t c g c g g t c g a g g c a g a g a c g c g t t t t g g g c a c c g t t t g t g t g g g g t g g g g c a g a g g g c t g c g t t t c g g c c t c g g g a a g a g c t t c t c g a c t c a c g g t t t c g c t t t c g c g g t c c a c g g g c c 43022

KY962518\_1 g c c c t g c c a g c c g g a t c t g t c t c g c t g a c g t c c c g c g g g t g t c g g g c t c c a t c t g g c g g c c g t t t g a g a t c g t g c t c t c g g c t c c g g a g c t g c g g t g g c a g c t g c c g a g g g a g g g a c c g t c c c c g 44037  
 human\_rDNA g c c c t g c c a g c c g g a t c t g t c t c g c t g a c g t c c c g c g g g t g t c g g g c t c c a t c t g g c g g c c g t t t g a g a t c g t g c t c t c g g c t c c g g a g c t g c g g t g g c a g c t g c c g a g g g a g g g a c c g t c c c c g 43152

KY962518\_1 c t g t g a g c t a g g c a g a g c t c c g g a a a g c c c g c g g t c g t c a g c c c c g g c t g g c c c g g t g g c g c c a g a g c t g t g g c g c t c g c t t g t g a g t c a c a g c t c t g g c g t g c a g g t t t a t g t g g g g a g a g g c t g t c g 44167  
 human\_rDNA c t g t g a g c t a g g c a g a g c t c c g g a a a g c c c g c g g t c g t c a g c c c c g g c t g g c c c g g t g g c g c c a g a g c t g t g g c g c t c g c t t g t g a g t c a c a g c t c t g g c g t g c a g g t t a t g t g g g g a g a g g c t g t c g 43282

KY962518\_1 c t g c g c t t c t g g g c c c g c g g c g g g c g t g g g g c t g c c c g g g c c g g t c g a c c a g c g c g c c g t a g c t c c c g a g g c c c g a g c c g c g a c c c g c g g g a c c c g c c g c g c g t g g c g c g g g a g g c t g g g g a c g c c c t t 44297  
 human\_rDNA c t g c g c t t c t g g g c c c g c g g c g g g c g t g g g g c t g c c c g g g c c g g t c g a c c a g c g c g c c g t a g c t c c c g a g g c c c g a g c c c g c g g g a c c c g c c c g c g c g t g g c g c g g g a g g c t g g g g a c g c c c t t 43412

KY962518\_1 c c c g g c c c g g t c g c g g g t c c g c g c t c a t c c t g g c c g t c t g a g g c g g c g g c c g a a t t c g t t t c c g a g t t c c c g t g g g g a g c c g g g a c c g t c c c g c c c c g t c c c c g g g t g c c g g g a - - - - - 44415  
 human\_rDNA c c c g g c c c g g t c g c g g g t c c g c g c t c a t c c t g g c c g t c t g a g g c g g c g g c c g a a t t c g t t t c c g a g t t c c c g t g g g g a g c c g g g a c c g t c c c g c c c c g t c c c c g g g t g c c g g g a - - - - - 43542

KY962518\_1 - - - - - g c g g t c c c t c t g c c g c g a t c c t t t c t g g c g a g t c c c c g t g c g g a g t c g g a g a g c g c t c c c t g a g c g c g c t g c g g c c c g a g a g g t c g c g c c t g g c c g c c t t c g g t c c c t c g t g t t c c c g t 44538  
 human\_rDNA c c g g c c c g c g g t c c c t c t g c c g c g a t c c t t t c t g g c g a g t c c c c g t g c g g a g t c g g a g a g c g c t c c c t g a g c g c g c t g c g g c c c g a g a g g t c g c g c t g g c c g c c t t c g g t c c c t c g t g t t c c c g t 43672

KY962518\_1 c g t a g g a g g g c c g g c c g a a a a t g c t t c c g g c t c c c g c t c t g g a g a c a c g g c c g g c c c c t g c g t g g c a c g g c g g c c g g g a g g g c t c c c c g g c c g g c g t g c t c c c g c g t g t g t c c t g g g g t t g 44668  
 human\_rDNA c g t a g g a g g g c c g g c c g a a a a t g c t t c c g g c t c c c g c t c t g g a g a c a c g g c c g g c c c c t g c g t g g c a c g g c g g c c g g g a g g g c t c c c c g g c c c g g c g t g c t c c c g c g t g t g t c c t g g g g t t g 43802

KY962518\_1 a c c a g a g g g c c c c g g c g c t c c g t g t g t g g c t g c a t g g t g g c g t t t t g g g g a c a g g t g t c c g t g t c g c g c t g c c t g g g c g g c g g c g t g g t c g g t g a c g c g a c c t c c c g g c c c c g g g g a g g t a t a 44798  
 human\_rDNA a c c a g a g g g c c c c g g c g c t c c g t g t g t g g c t g c a t g g t g g c g t t t t g g g g a c a g g t g t c c g t g t c g c g c t g c c t g g g c g g c g g c g t g g t c g g t g a c g c g a c c t c c c g g c c c c g g g g a g g t a t a 43932

KY962518\_1 t c t t t c g c t c c g a g t c g g c a t t t t g g g c c g c g g g t t a t t 44838  
 human\_rDNA t c t t t c g c t c c g a g t c g g c a t t t t g g g c c g c g g g t t a t t 43972
