# Supplementary material for: The conservation landscape of the human ribosomal RNA gene repeats
Source: PubMed Central journal article supplement (PMC6281188; doi:10.1371/journal.pone.0207531), 2018-12-05
Supplement: pone.0207531.s009.pdf [file pone.0207531.s009.pdf]

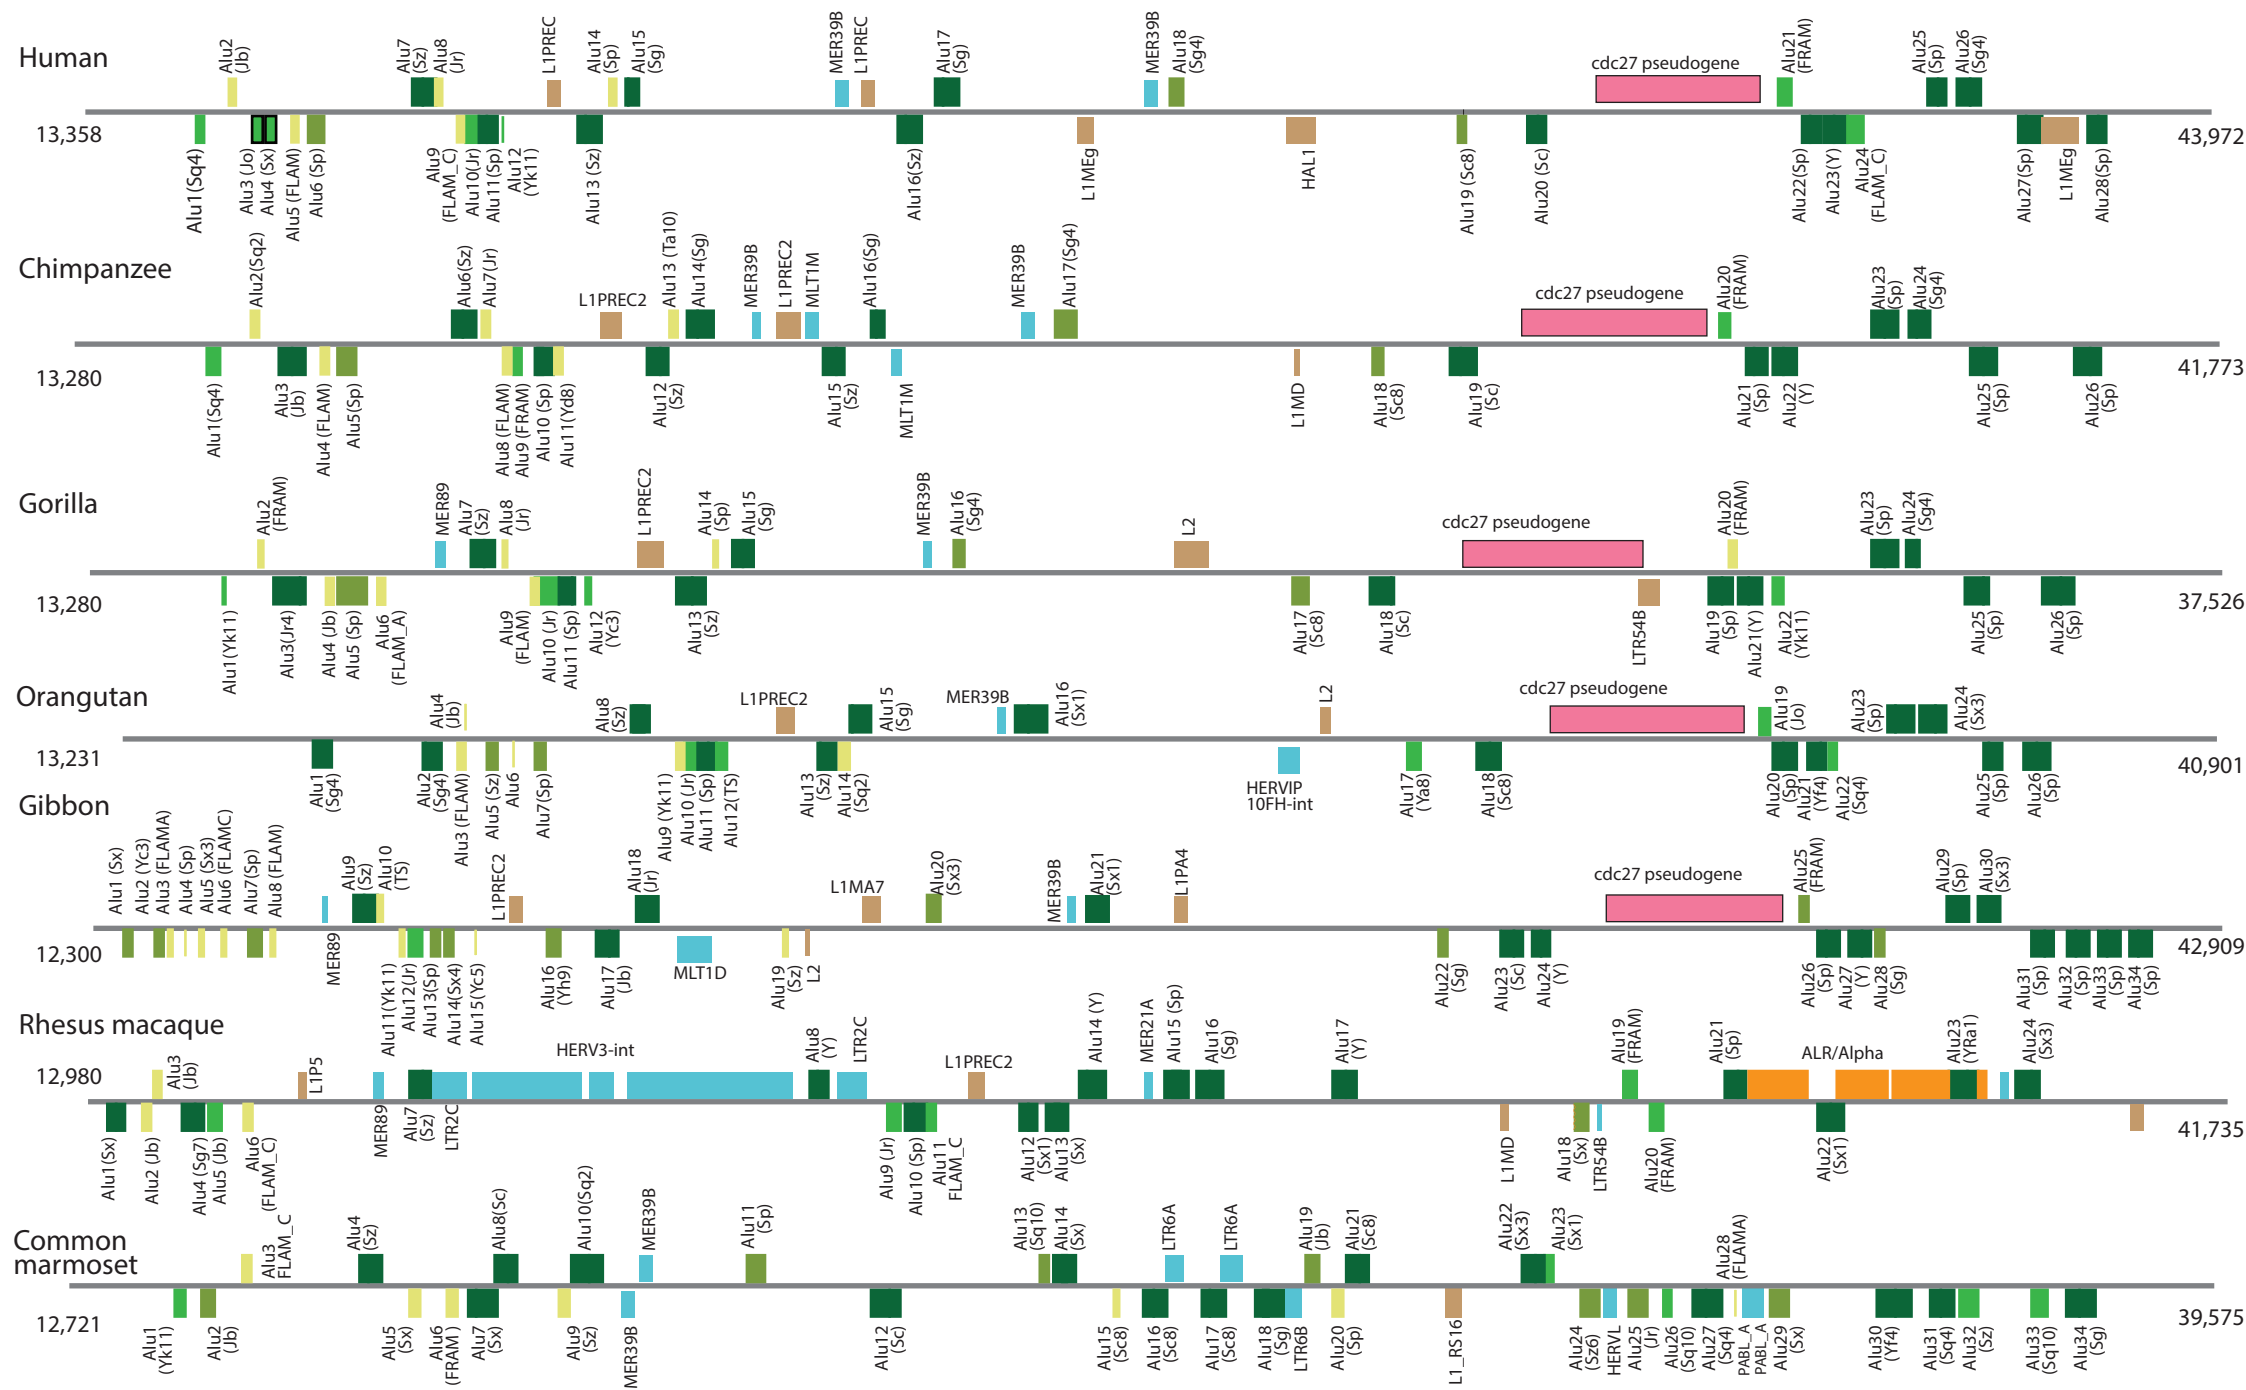

**S2 Figure: Repeat elements in the IGS of different primates species.** The IGS is shown as a grey line. Repeat elements are indicated above and below the IGS as follows: Alu elements (green boxes), LTRs (blue boxes), L1s (brown boxes), and satellites (orange boxes), with the names alongside. The cdc27 pseudogene is shown as a pink box. Elements above the rDNA are on the forward strand; elements below are on the reverse strand. The start and end coordinates of the IGS are indicated.
