# Supplementary material for: The conservation landscape of the human ribosomal RNA gene repeats
Source: PubMed Central journal article supplement (PMC6281188; doi:10.1371/journal.pone.0207531), 2018-12-05
Supplement: pone.0207531.s014.pdf [file pone.0207531.s014.pdf]

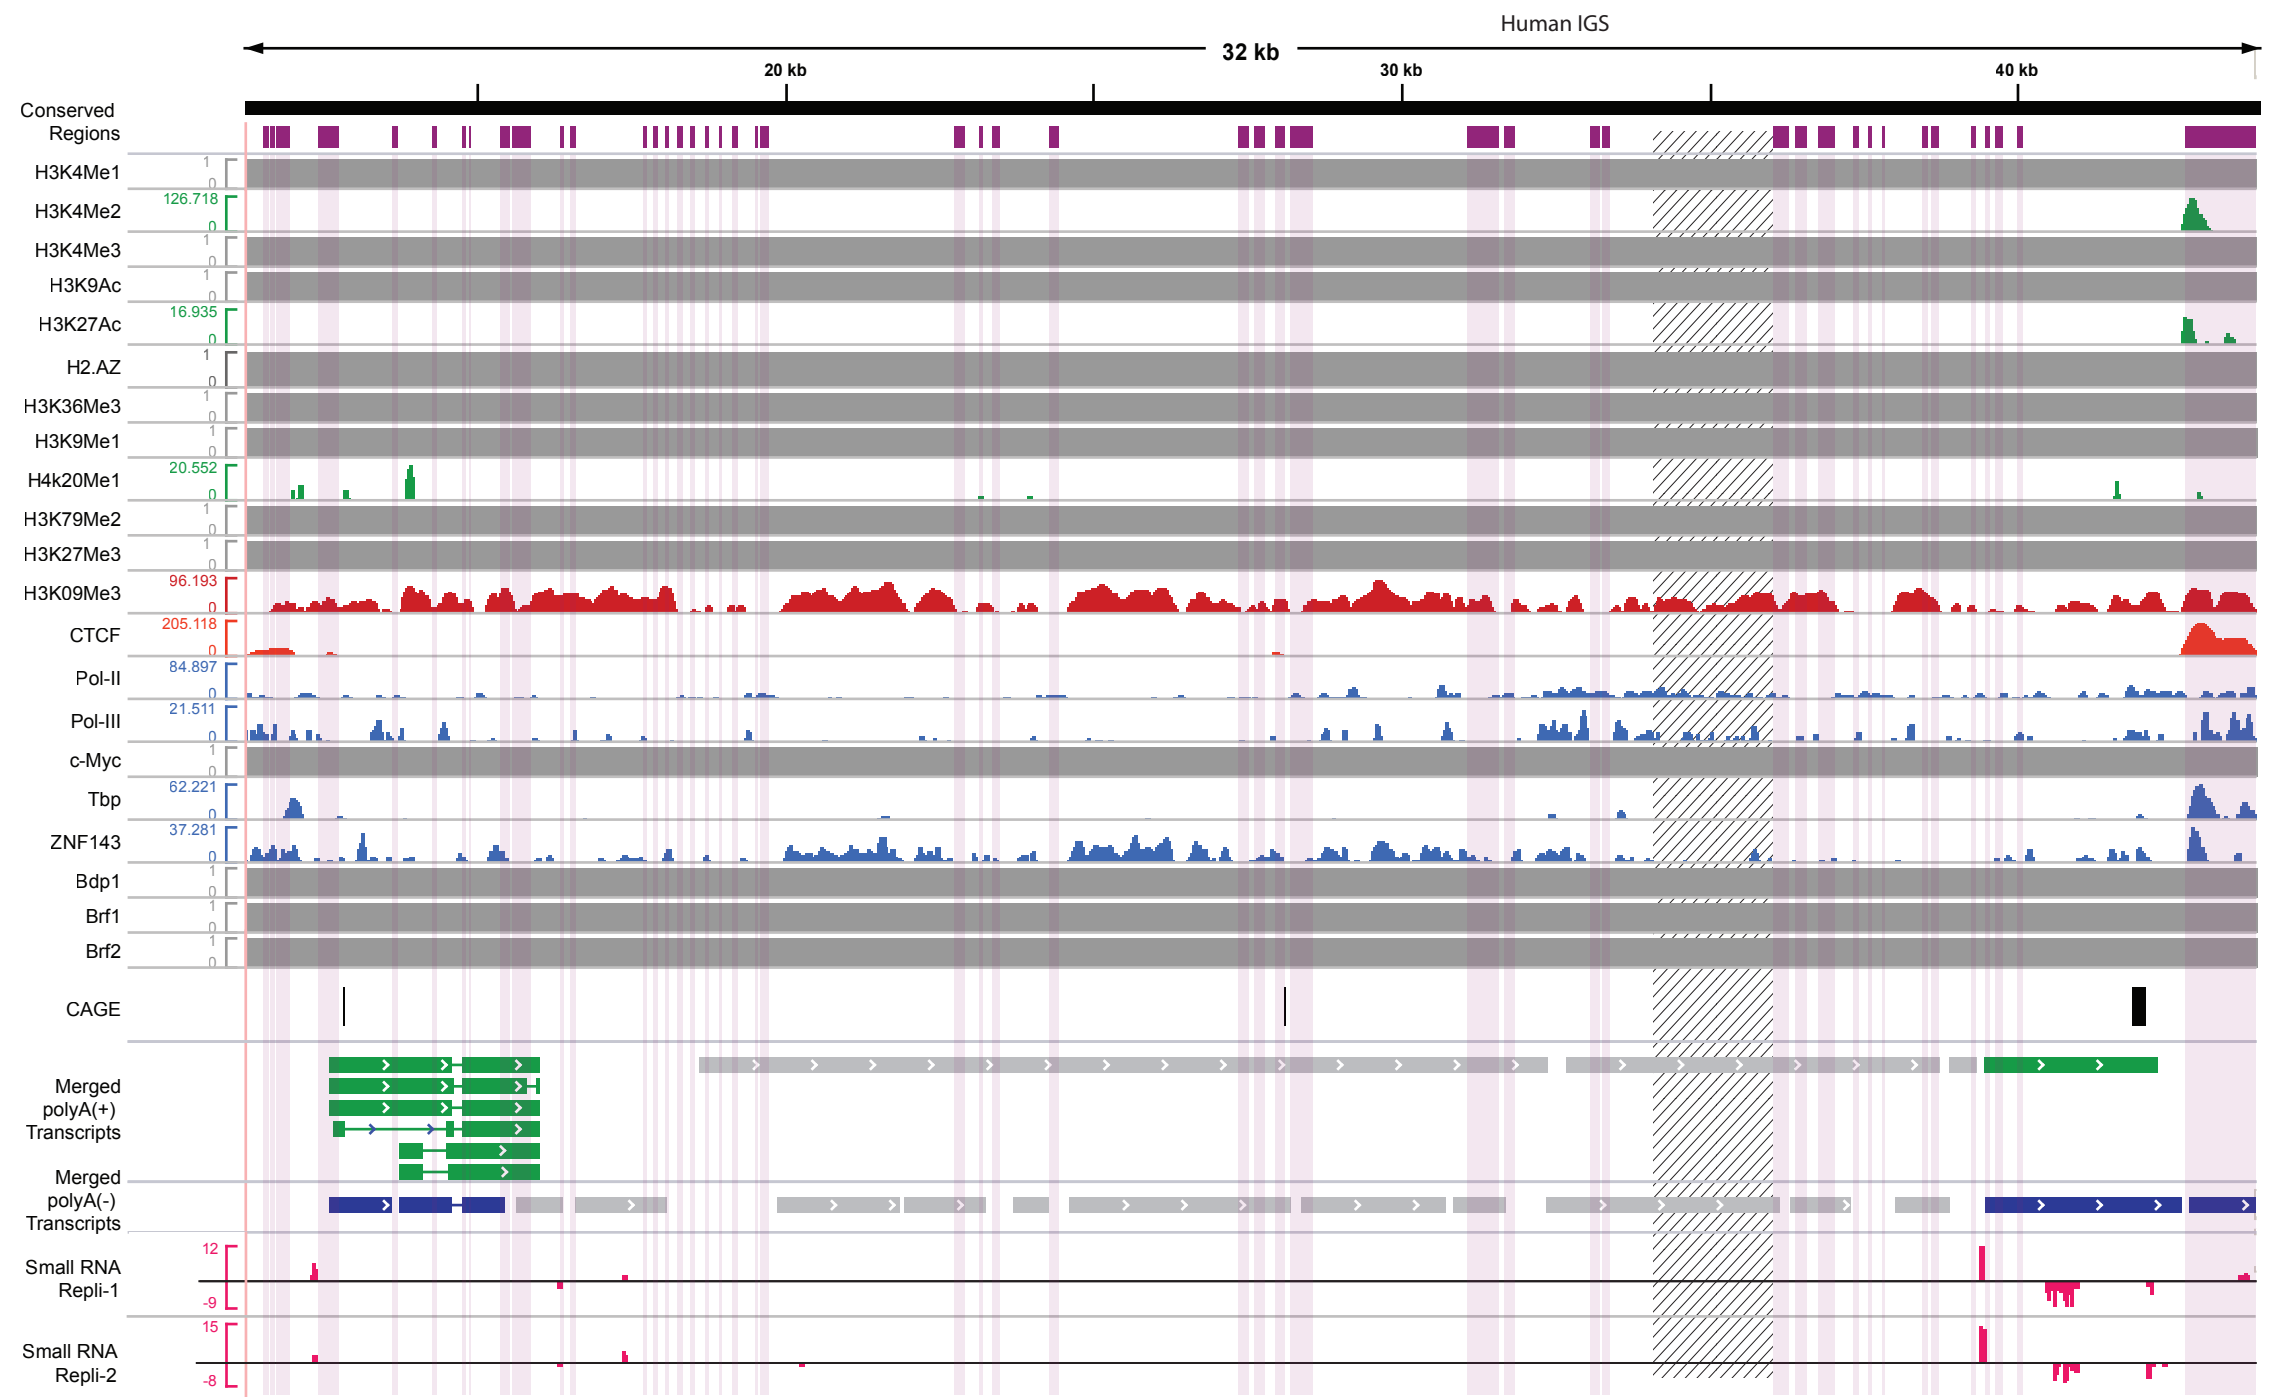

**S7 Figure: Chromatin, transcription factor and transcript landscape of the IGS in the lymphoblastoid cell line, GM12878.** Figure as for S6 Figure, except that the blue signals represent transcription factors and RNA polymerases, and pink signals indicated small RNA transcripts.
