# Supplementary material for: The conservation landscape of the human ribosomal RNA gene repeats
Source: PubMed Central journal article supplement (PMC6281188; doi:10.1371/journal.pone.0207531), 2018-12-05
Supplement: pone.0207531.s015.pdf [file pone.0207531.s015.pdf]

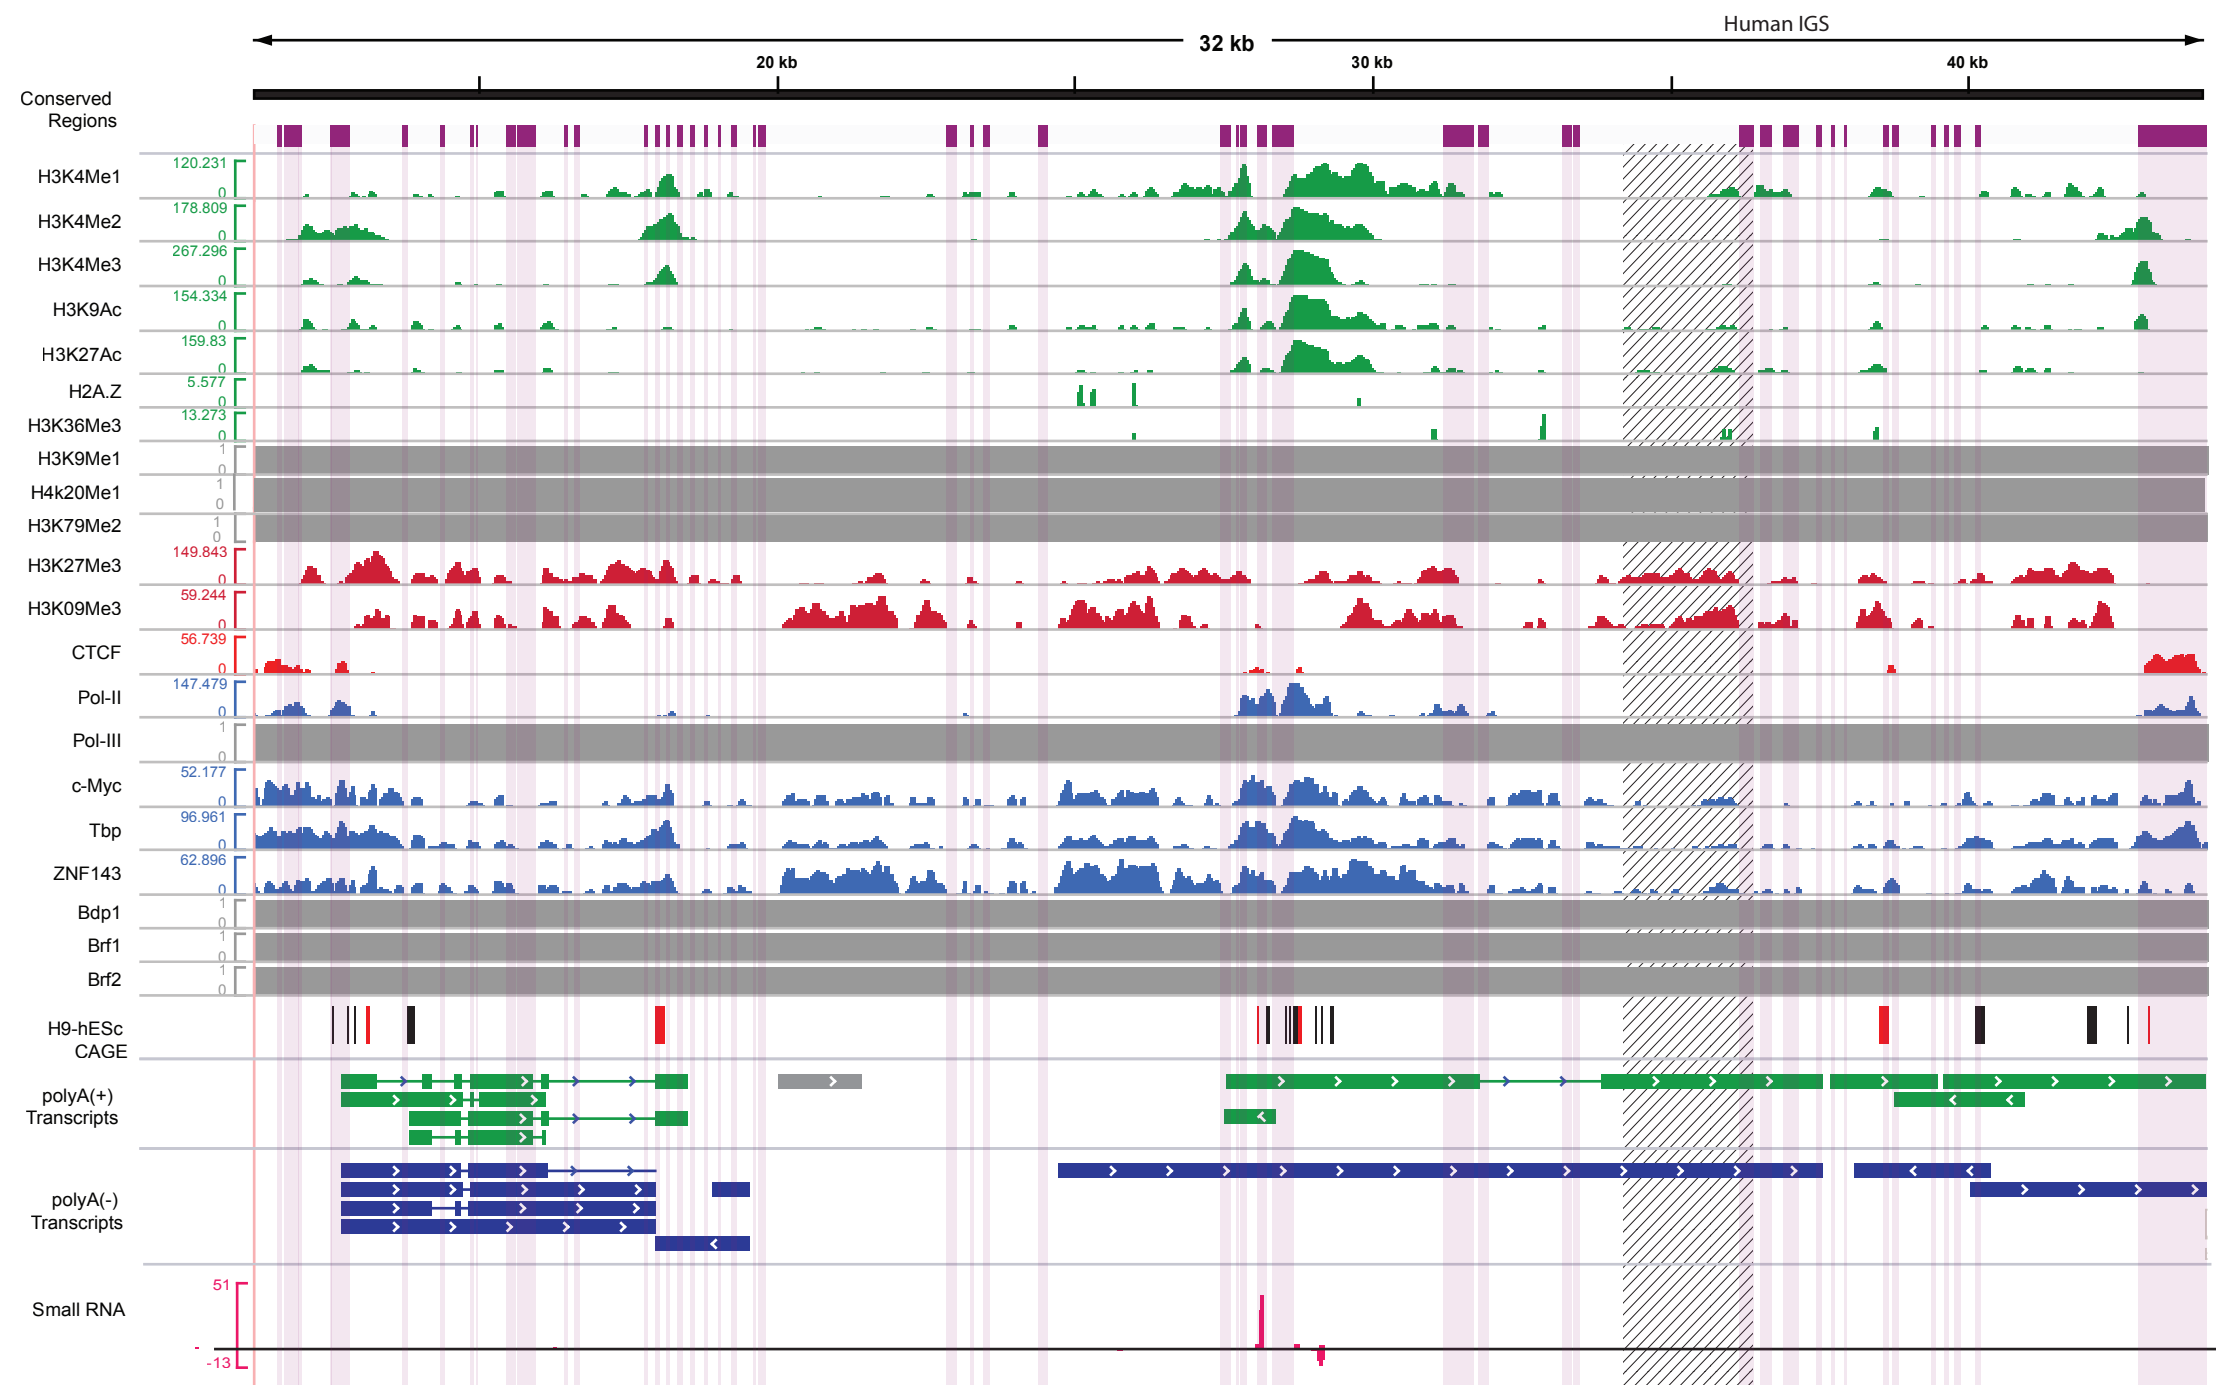

**S8 Figure: Chromatin, transcription factor and transcript landscape of the IGS in the embryonic stem cell line, H1-hESC.** Figure as for Figure S7. The CAGE data come from H9-hESC, not H1-hESC.
