# Supplementary material for: The conservation landscape of the human ribosomal RNA gene repeats
Source: PubMed Central journal article supplement (PMC6281188; doi:10.1371/journal.pone.0207531), 2018-12-05
Supplement: pone.0207531.s016.pdf [file pone.0207531.s016.pdf]

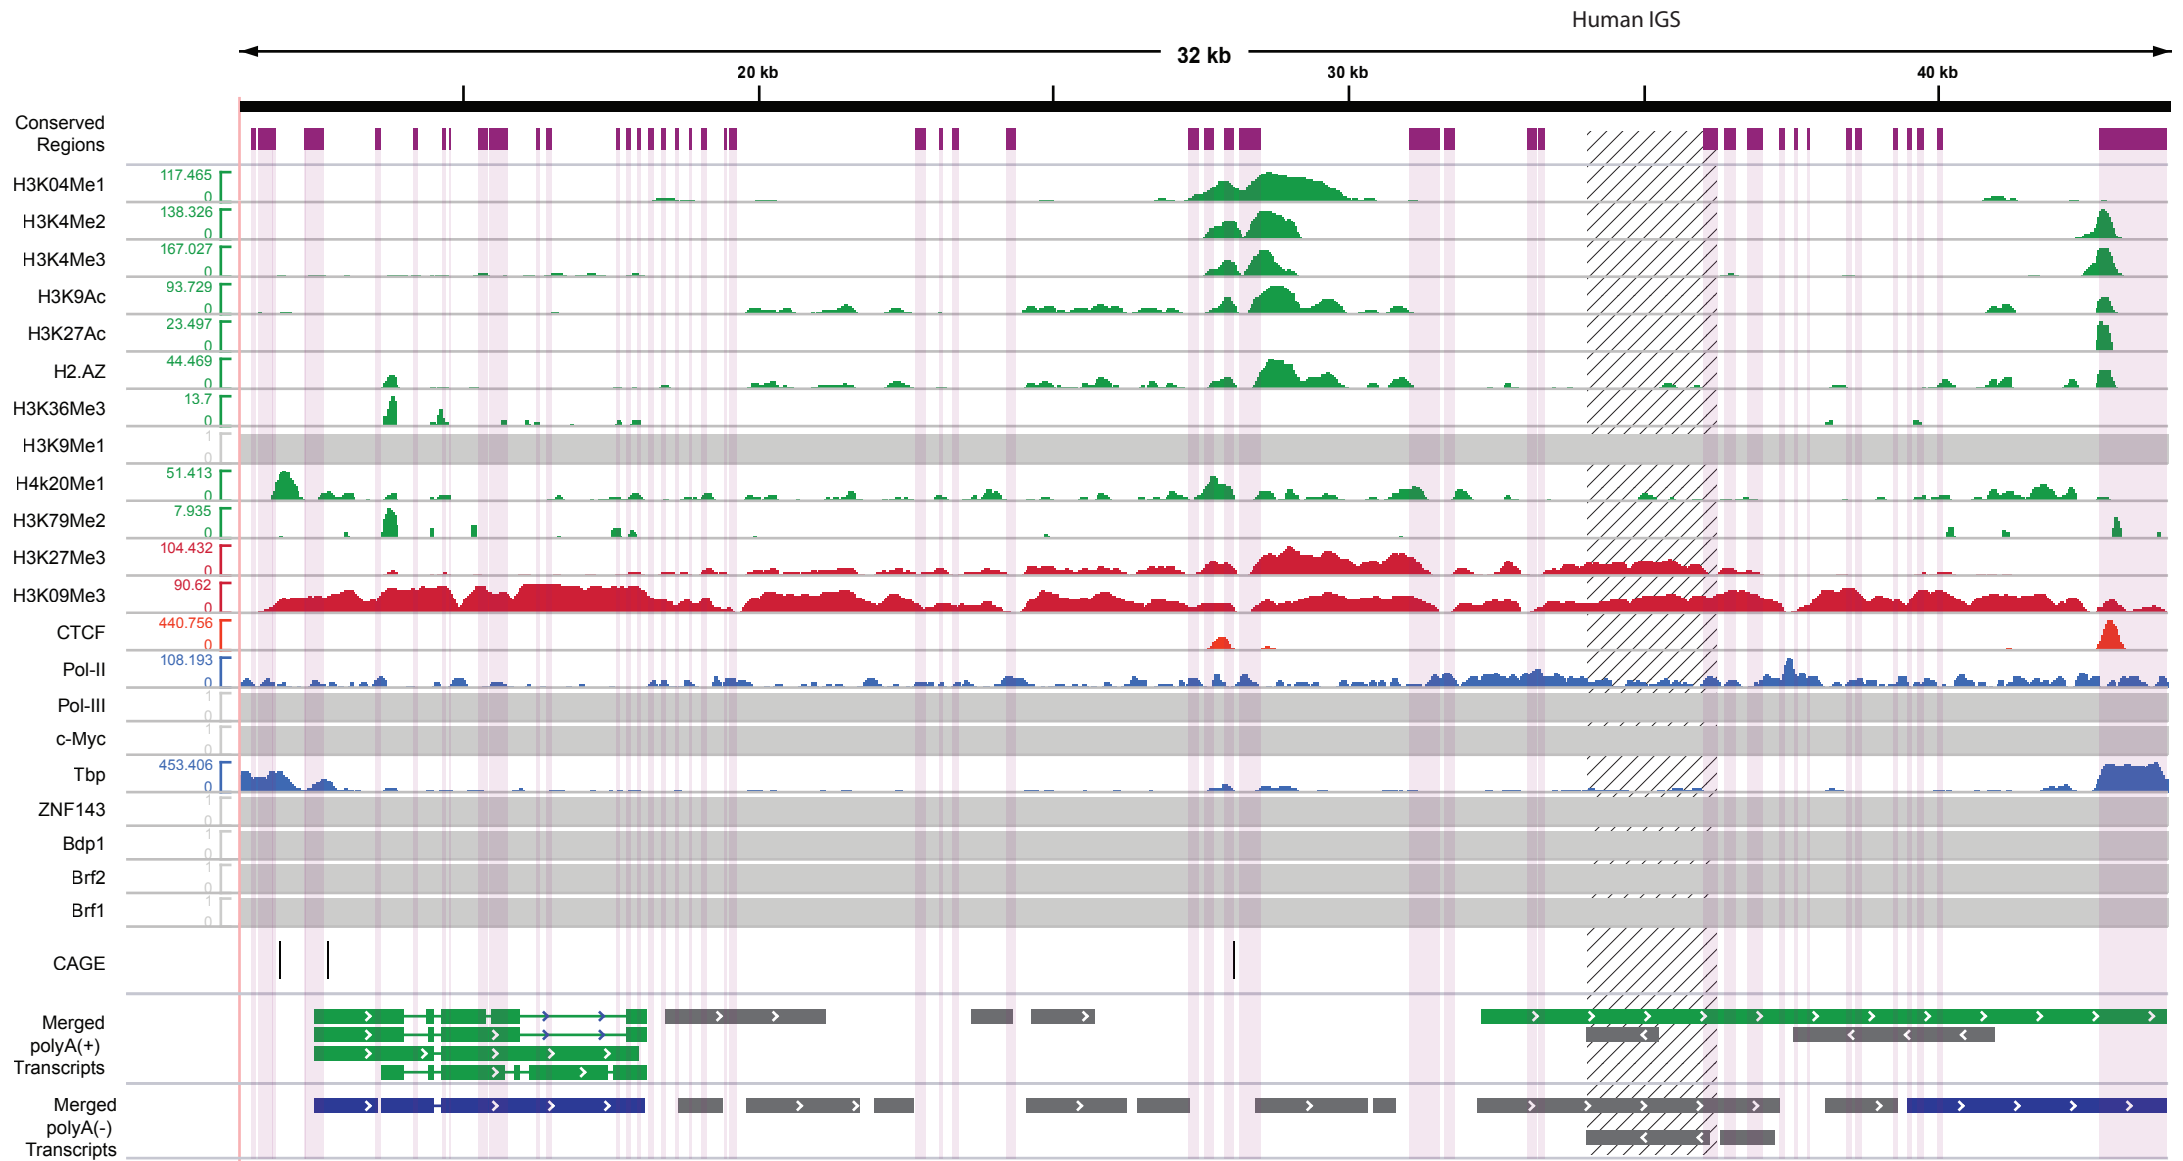

**S9 Figure: Chromatin, transcription factor and transcript landscape of the IGS in the hepatocellular carcinoma cell line, HepG2. Figure as for Figure S7.**
