# Supplementary material for: The conservation landscape of the human ribosomal RNA gene repeats
Source: PubMed Central journal article supplement (PMC6281188; doi:10.1371/journal.pone.0207531), 2018-12-05
Supplement: pone.0207531.s017.pdf [file pone.0207531.s017.pdf]

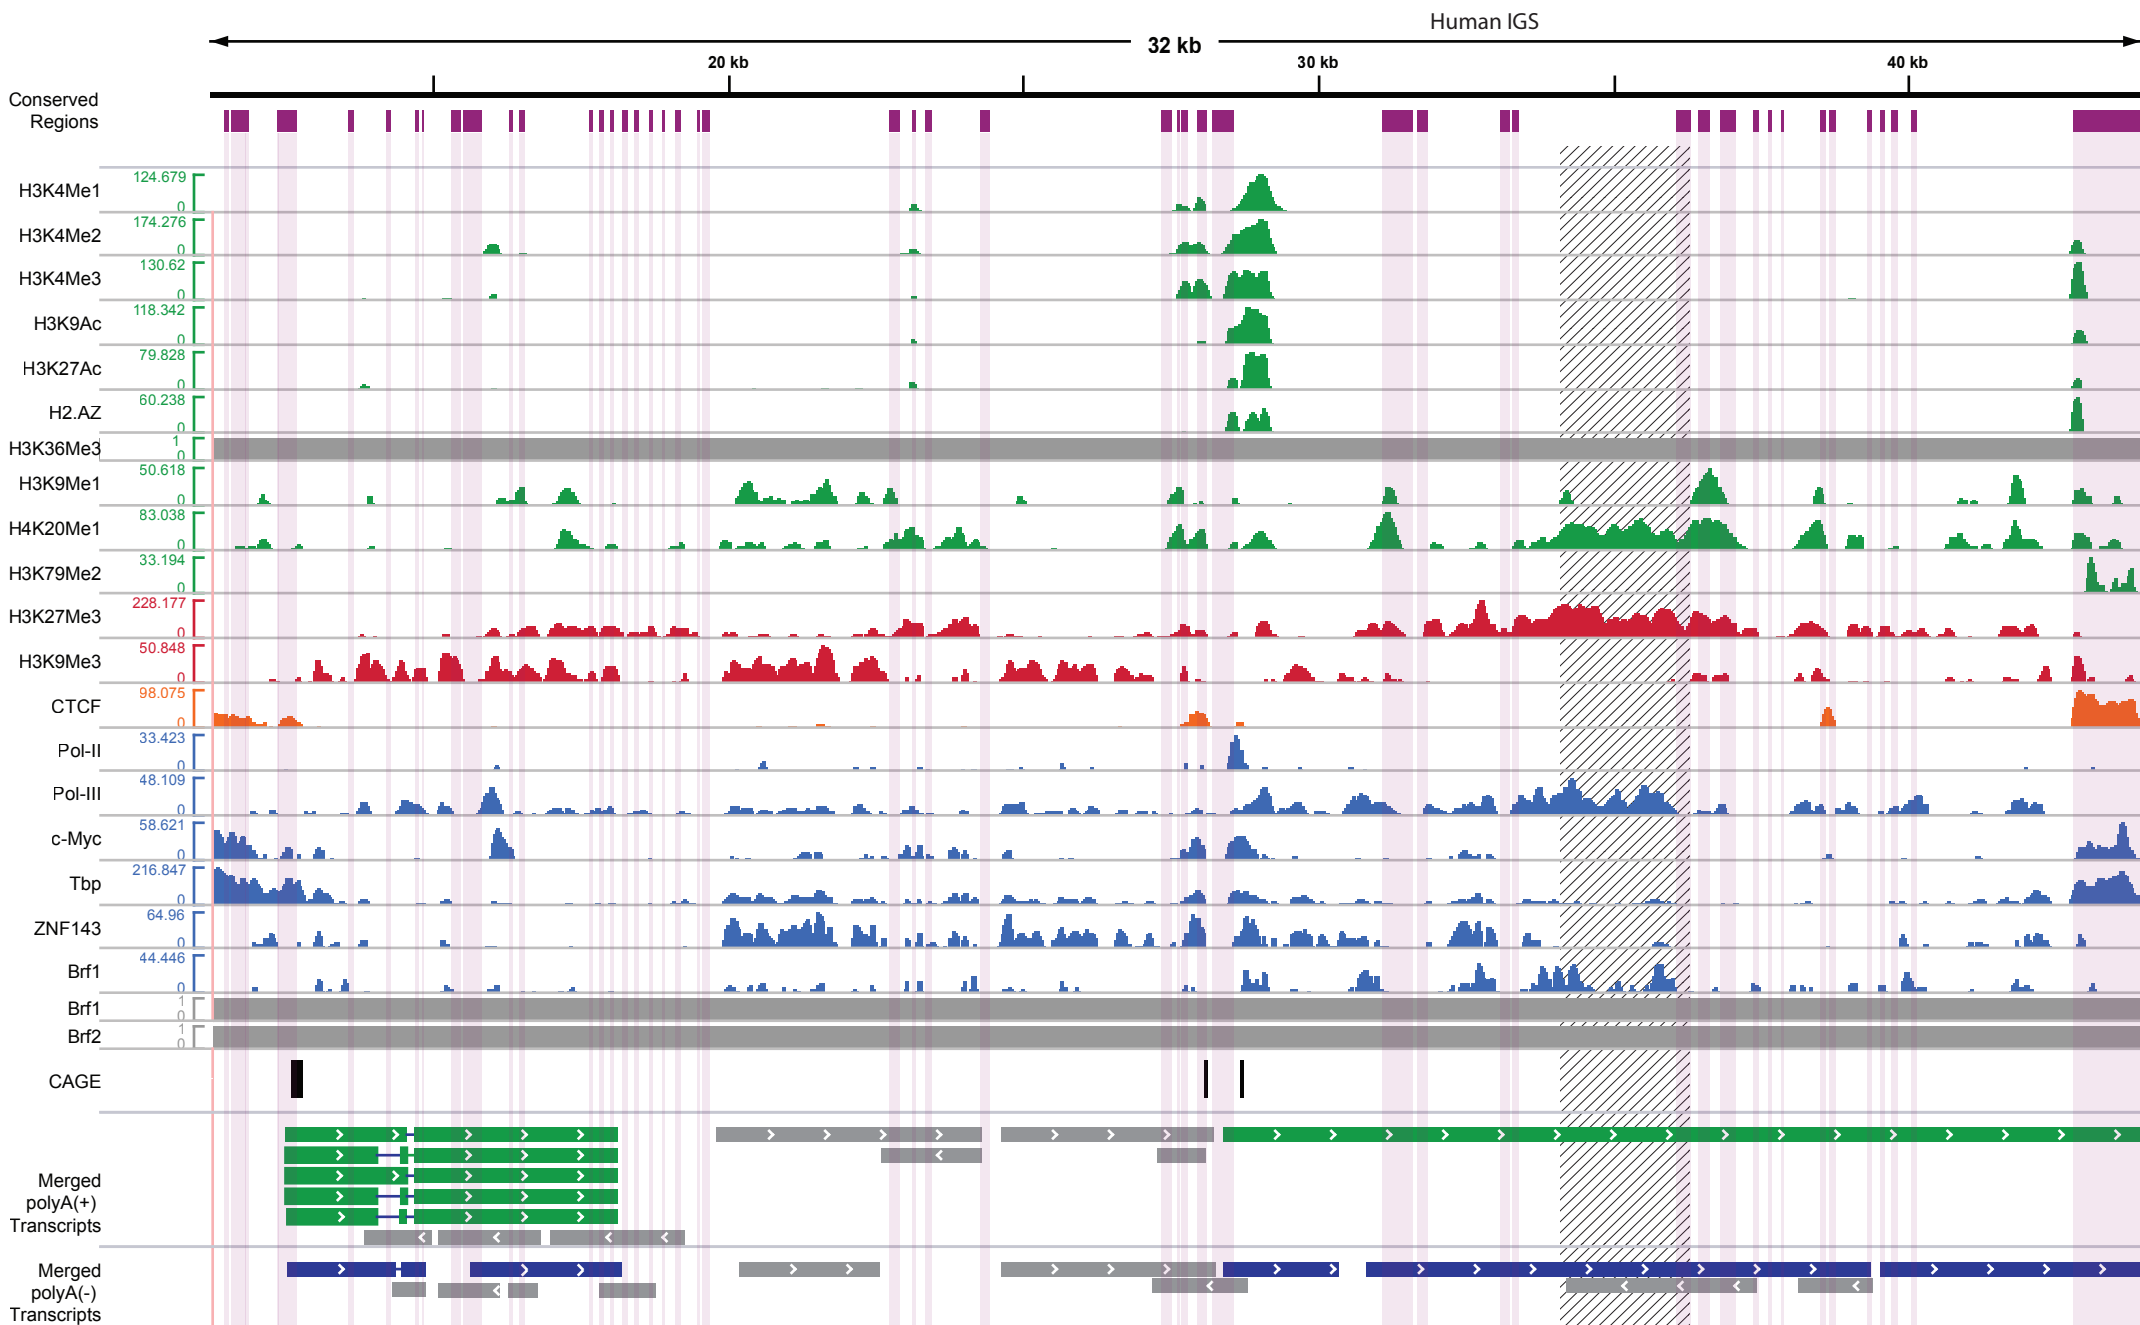

**S10 Figure: Chromatin, transcription factor and transcript landscape of the IGS in the leukaemia cell line, K562.** Figure as for **Figure S7**.
