# Supplementary material for: The conservation landscape of the human ribosomal RNA gene repeats
Source: PubMed Central journal article supplement (PMC6281188; doi:10.1371/journal.pone.0207531), 2018-12-05
Supplement: pone.0207531.s018.pdf [file pone.0207531.s018.pdf]

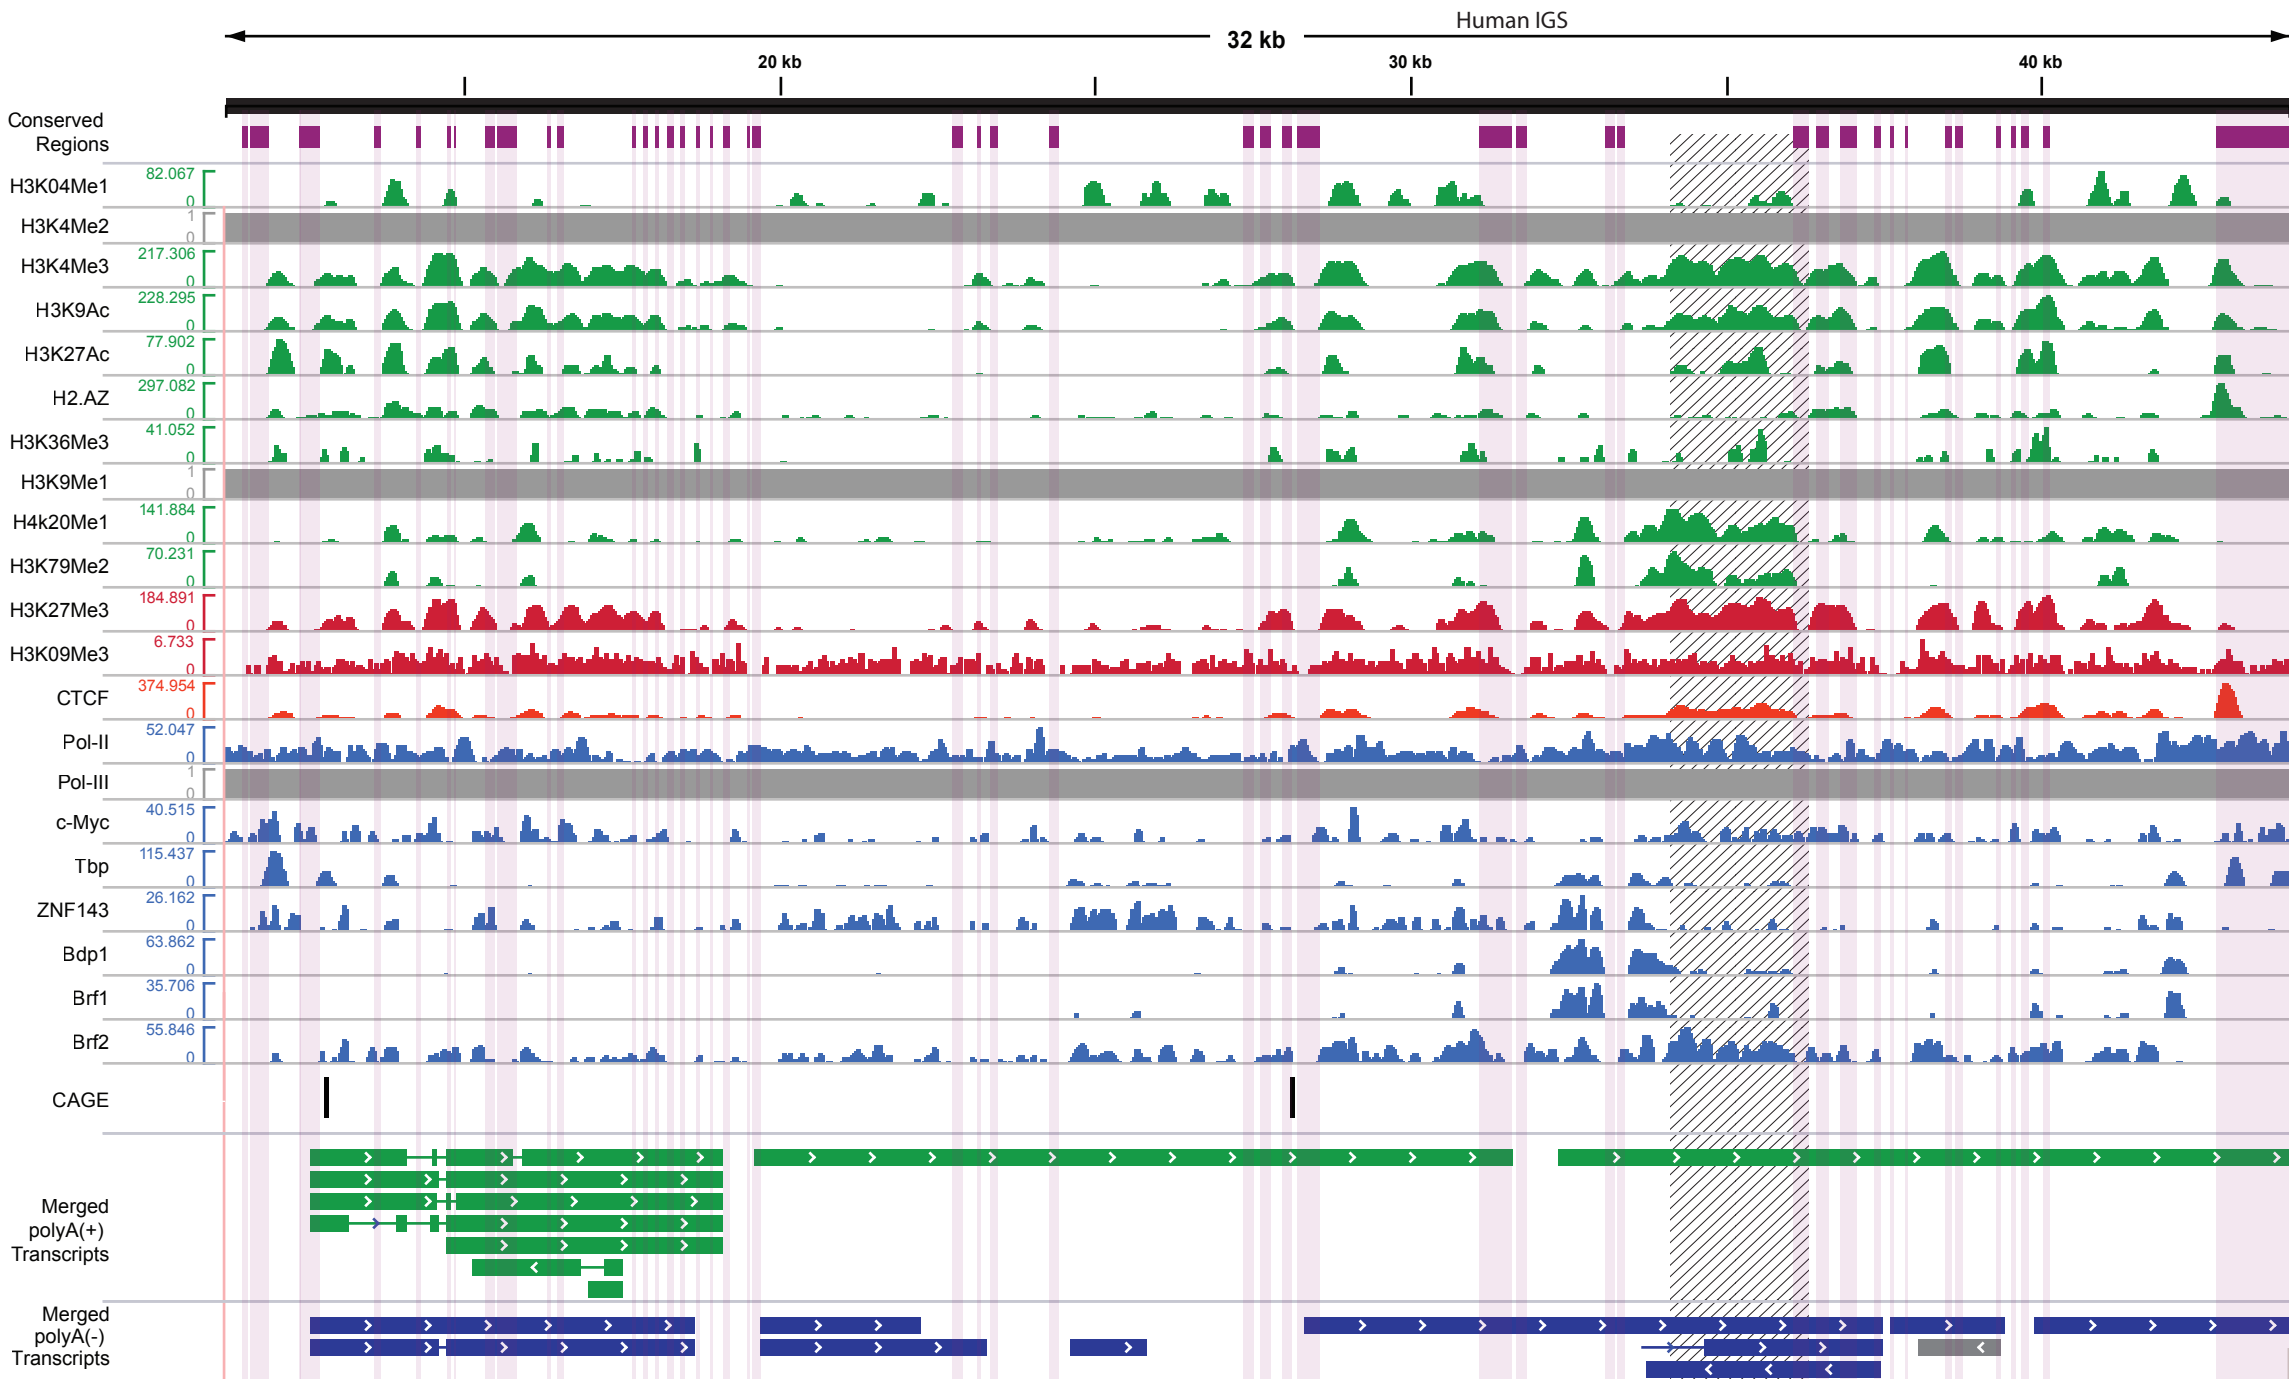

**S11 Figure: Chromatin, transcription factor and transcript landscape of the IGS in the cervical carcinoma cell line, HeLa-S3. Figure as for Figure S7.**

**Agrawal & Ganley, S11 Figure**
