# Supplementary material for: The conservation landscape of the human ribosomal RNA gene repeats
Source: PubMed Central journal article supplement (PMC6281188; doi:10.1371/journal.pone.0207531), 2018-12-05

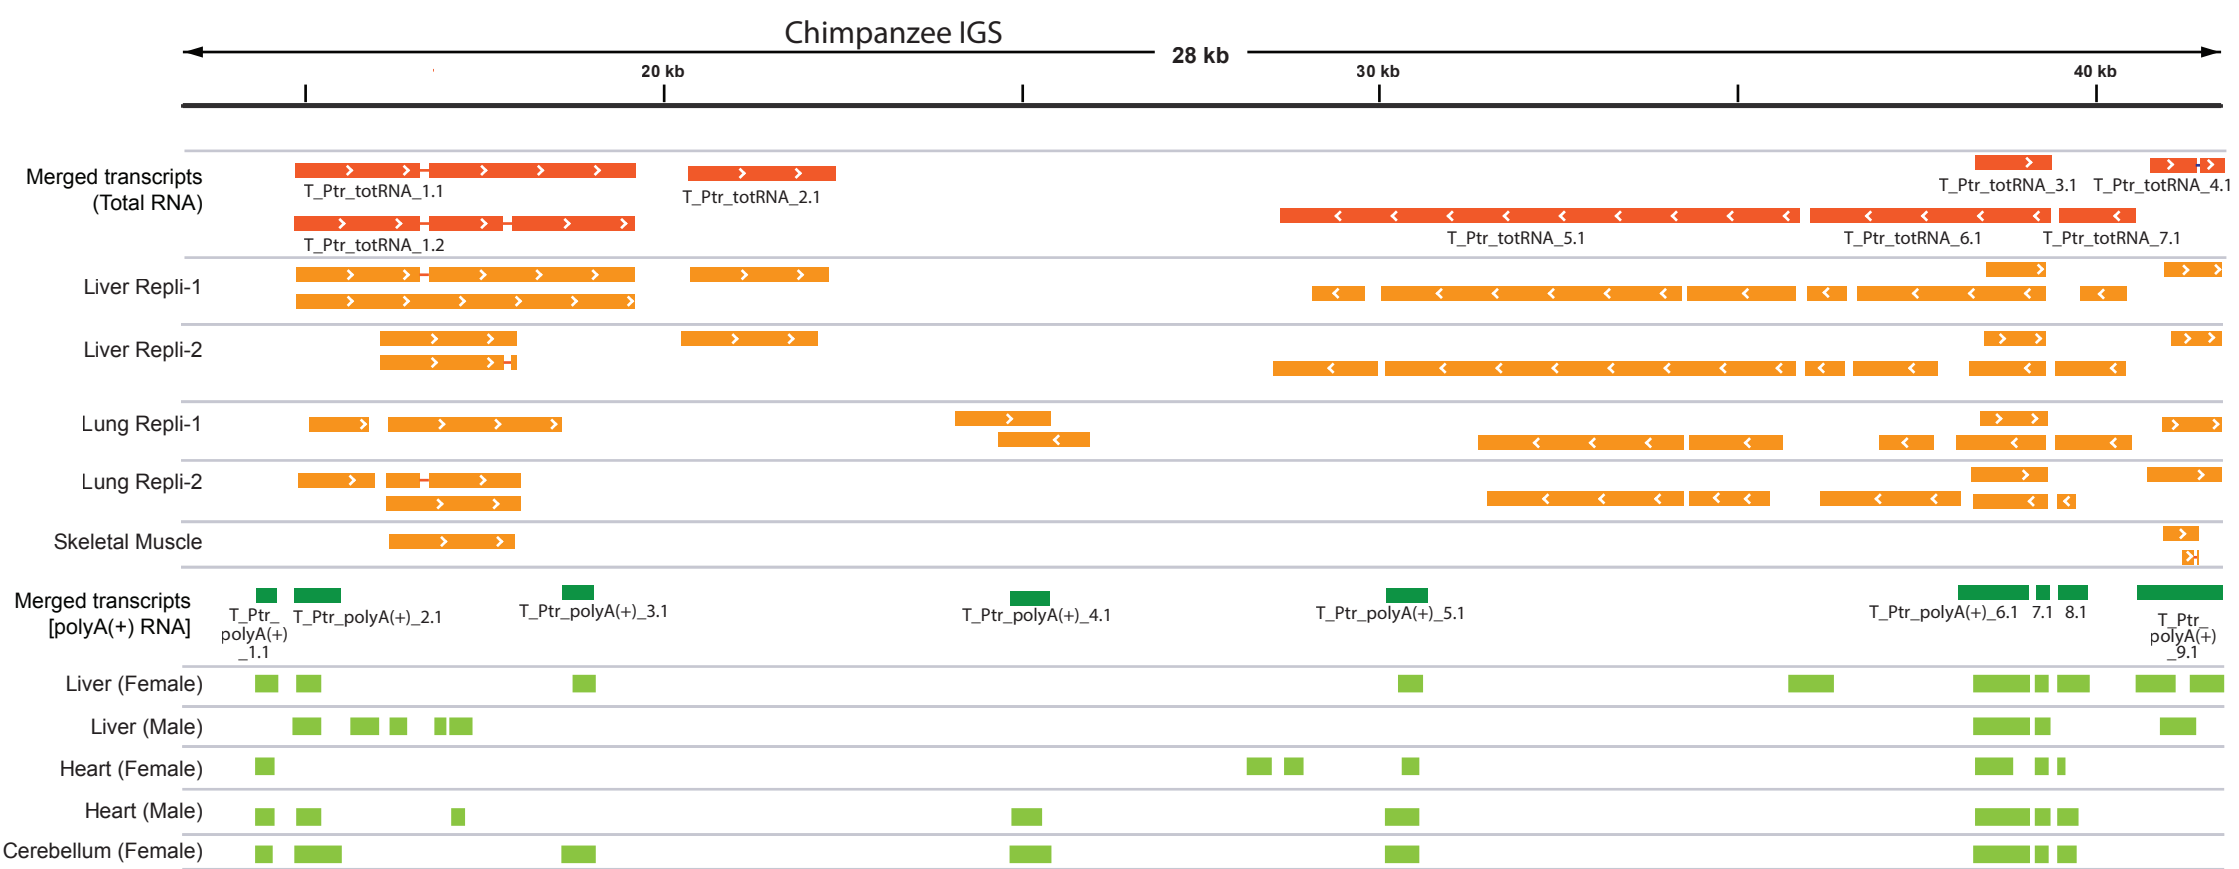

Supplement: pone.0207531.s021.pdf [file pone.0207531.s021.pdf]
