# Supplementary material for: The conservation landscape of the human ribosomal RNA gene repeats
Source: PLoS One. 2018 Dec 5;13(12):e0207531. doi: 10.1371/journal.pone.0207531 (PMC6281188; doi:10.1371/journal.pone.0207531)
Supplement: S9 Table — (XLS) [file pone.0207531.s033.xls]

## Sheet: Sheet1
S9 Table: Sequence identity of the conserved regionswithcommon marmosetand mouse rDNA.
Conserved region	%identity with Callithrix	%identity with Mouse
c1	40.5	46.6
c2	51.6	0
c3	48.6	37.4
c4	50.9	0
c5	27.4	18.1
c6	28	0
c7	60	16.9
c8	15.8	28.4
c9	0	35.3
c10	13.6	22.2
c11	46.2	26.8
c12	66.1	37.9
c13	72.1	29.4
c14	62.5	31.6
c15	68.4	38.4
c16	52.7	38.2
c17	33.3	8.6
c18	0	32.8
c19	0	43.6
c20	0	33.3
c21	55.6	34.4
c22	80.8	52.4
c23	54.9	32.3
c24	75.7	22.4
c25	4.4	23.5
c26	0	32.1
c27	65	0.7
c28	15.8	28.8
c29	28.1	31.3
c30	33.6	43
c31	57.8	30.6
c32	55.9	36
c33	36.2	25.2
c34	5.9	34.8
c35	80	56.7
c36	79.5	51.6
c37	12.9	21.4
c38	73.6	31.5
c39	50.6	39.5
c40	19.4	36.1
c41	52.2	42.9
c42	0	74.5
c43	74.3	35.3
c44	66.6	22.7
c45	32	31
c46	10.8	38.2
c47	4.8	30.1
c48	28.4	35.6
c49	69.7	36.2
