# Supplementary material for: The conservation landscape of the human ribosomal RNA gene repeats
Source: PLoS One. 2018 Dec 5;13(12):e0207531. doi: 10.1371/journal.pone.0207531 (PMC6281188; doi:10.1371/journal.pone.0207531)
Supplement: S27 Table — (XLS) [file pone.0207531.s051.xls]

## Sheet: Sheet1
S27 Table: Details of long poly(A+) noncoding RNA IGS transcripts in Rhesus macaque
Transcript name	Feature	Start coordinates	End coordinates	Effective length	Strand
T_Mmu_poly(A+)-1.1	transcript	14875	16004	1130	.
	exon	14875	16004		.
T_Mmu_poly(A+)-1.2	transcript	14556	16004	1449	.
	exon	14556	16004		.
T_Mmu_poly(A+)-2.1	transcript	16171	16553	383	.
	exon	16171	16553		.
T_Mmu_poly(A+)-3.1	transcript	16604	18135	1532	.
	exon	16604	18135		.
T_Mmu_poly(A+)-4.1	transcript	18329	19259	931	.
	exon	18329	19259		.
T_Mmu_poly(A+)-5.1	transcript	19877	20593	717	.
	exon	19877	20593		.
T_Mmu_poly(A+)-6.1	transcript	21108	21458	351	.
	exon	21108	21458		.
